# Supplementary material
Source: PubMed Central journal article supplement (PMC6768323)
Supplement: ehp4372.s001.acco.pdf [file ehp4372.s001.acco.pdf]

**Note to readers with disabilities:** *EHP* strives to ensure that all journal content is accessible to all readers. However, some figures and Supplemental Material published in *EHP* articles may not conform to [508 standards](#) due to the complexity of the information being presented. If you need assistance accessing journal content, please contact [ehp508@niehs.nih.gov](mailto:ehp508@niehs.nih.gov). Our staff will work with you to assess and meet your accessibility needs within 3 working days.

### **Supplemental Material**

#### **Adverse Maternal, Fetal, and Postnatal Effects of Hexafluoropropylene Oxide Dimer Acid (GenX) from Oral Gestational Exposure in Sprague-Dawley Rats**

Justin M. Conley, Christy S. Lambricht, Nicola Evans, Mark J. Strynar, James McCord, Barry S. McIntyre, Gregory S. Travlos, Mary C. Cardon, Elizabeth Medlock-Kakaley, Phillip C. Hartig, Vickie S. Wilson, and L. Earl Gray Jr.

#### **Table of Contents**

**Figure S1.** Ex vivo fetal testis testosterone production measured on gestation day (GD) 18 following maternal oral hexafluoropropylene oxide-dimer acid (HFPO-DA) exposure from GD14-18. Experiments were conducted across two blocks of n=15 dams per block (control n=6, treated n=3 dams per dose) with testosterone concentration normalized to the mean control concentration within a given block. Data points indicate individual litter values (mean of three male pups per litter), bars and whiskers indicate mean  $\pm$  standard error.

**Figure S2.** Hexafluoropropylene oxide-dimer acid (HFPO-DA) in vitro agonism and antagonism activity for estrogen (a,b), androgen (c,d), and glucocorticoid (e,f) receptors. Estrogen activity assessed using 17 $\beta$ -estradiol (E2) as reference agonist and ICI-182-087 (ICI) as reference antagonist. Androgen activity assessed using dihydrotestosterone (DHT) as reference agonist and hydroxyflutamide (OHF) as reference antagonist. Glucocorticoid activity assessed using dexamethasone (Dex) as reference agonist and mifepristone (Mif) as reference antagonist. Data points represent mean  $\pm$  standard deviation (n=2-3 biological replicates (i.e., unique cell passages), with n=4 technical replicates per dose within a biological replicate).

**Table S1.** Identification of genes on custom array plate developed to identify genomic biomarkers of phthalated-induced male reproductive developmental toxicity in fetal rat testis.

**Table S2.** Identification of PPAR pathway genes analyzed in maternal and fetal livers using Qiagen RT<sup>2</sup> Profiler PCR Array Rat PPAR Targets (Cat no. PARN-149Z).

**Table S3.** Fetal liver (collected GD18) PPAR gene expression following GD14-18 maternal oral exposure to HFPO-DA.

**Table S4.** Fetal testis (collected GD18) gene expression of genes associated with phthalate-like male reproductive effects following GD14-18 maternal oral exposure to HFPO-DA.

**Table S5.** Maternal and fetal endpoints from GD14-18 oral maternal HFPO-DA exposure.

**Table S6.** Maternal liver (collected GD18) PPAR gene expression following GD14-18 maternal oral exposure to HFPO-DA.

**Table S7.** Maternal, perinatal, and pubertal endpoints from pilot postnatal study (GD14-18 oral maternal HFPO-DA dosing).

**Table S8.** Adult male necropsy endpoints from pilot postnatal study (GD14-18 oral maternal HFPO-DA dosing).

**Table S9.** Adult female necropsy endpoints from pilot postnatal study (GD14-18 oral maternal HFPO-DA dosing).

**Table S10.** Maternal serum and fetal/neonatal plasma HFPO-DA concentrations.

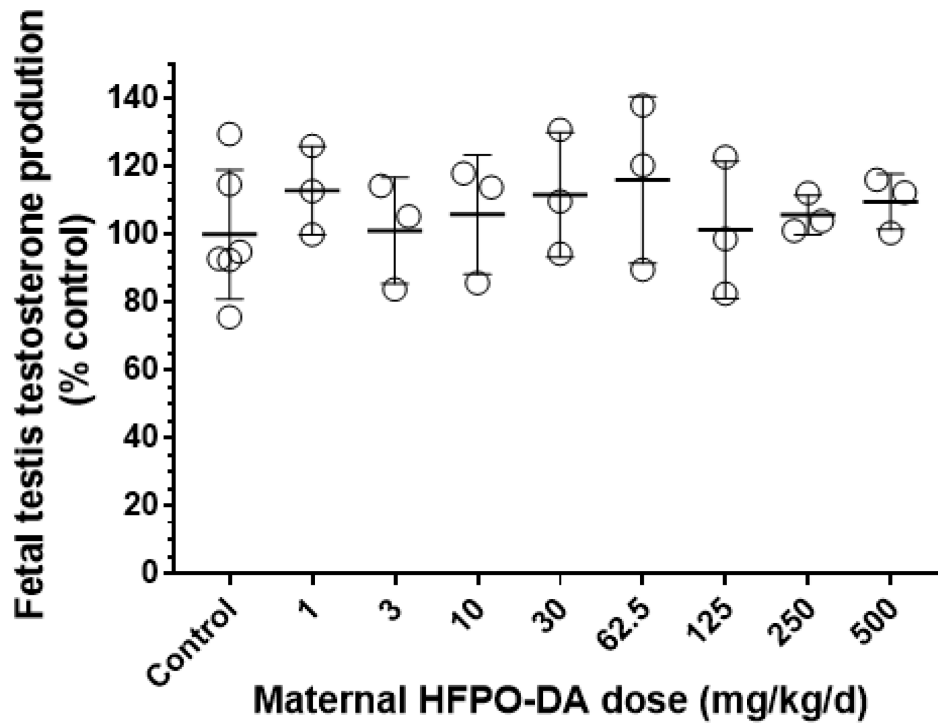

**Figure S1.** Ex vivo fetal testis testosterone production measured on gestation day (GD) 18 following maternal oral hexafluoropropylene oxide-dimer acid (HFPO-DA) exposure from GD14-18. Experiments were conducted across two blocks of n=15 dams per block (control n=6, treated n=3 dams per dose) with testosterone concentration normalized to the mean control concentration within a given block. Data points indicate individual litter values (mean of three male pups per litter), bars and whiskers indicate mean  $\pm$  standard error.

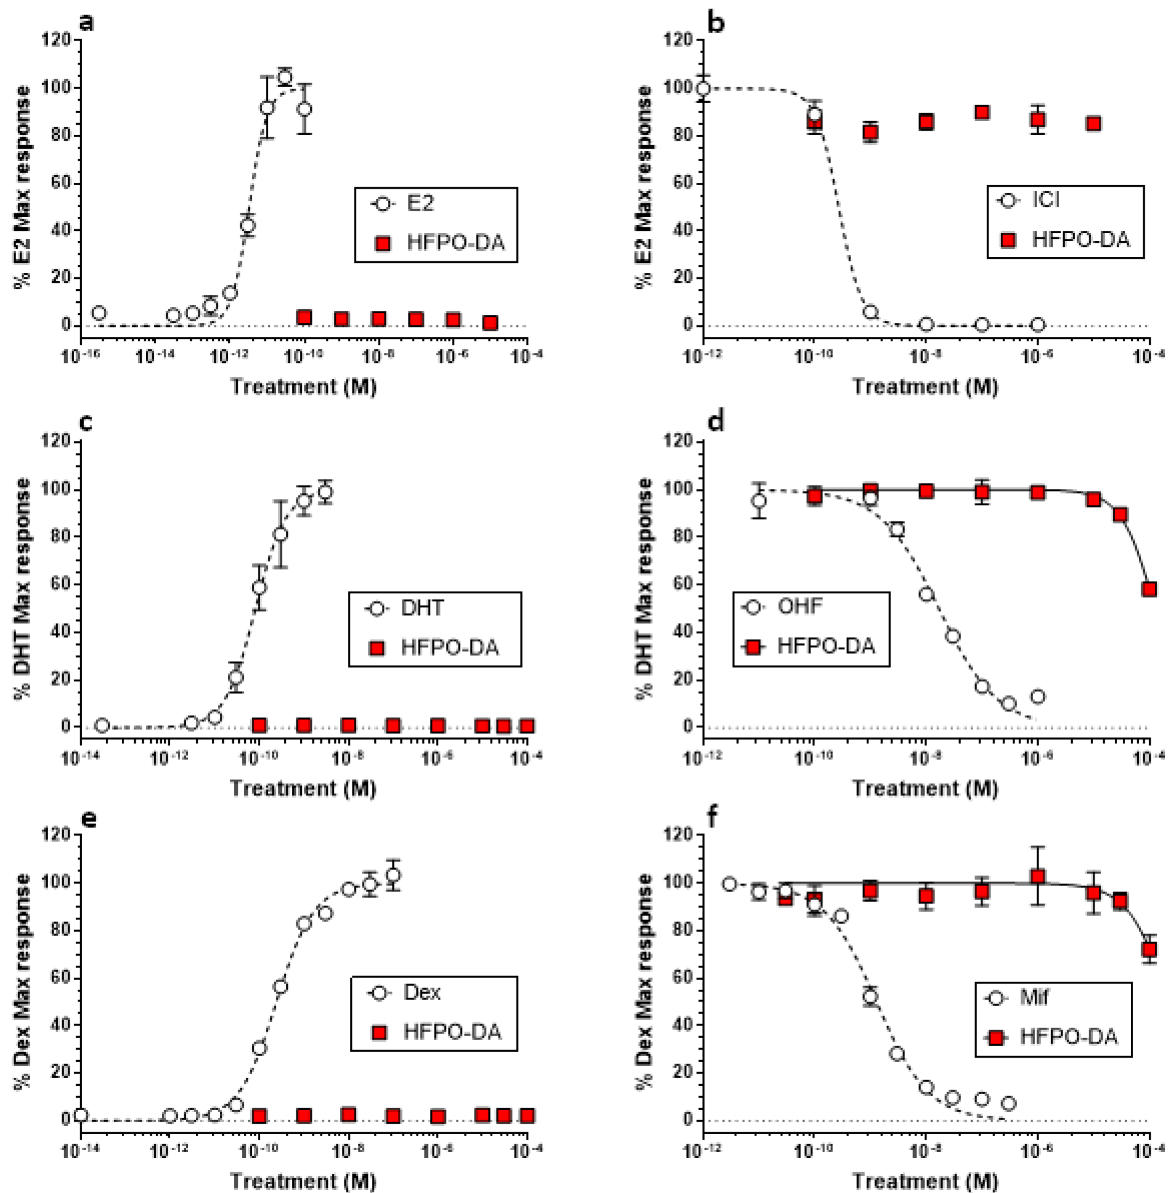

**Figure S2.** Hexafluoropropylene oxide-dimer acid (HFPO-DA) in vitro agonism and antagonism activity for estrogen (a,b), androgen (c,d), and glucocorticoid (e,f) receptors. Estrogen activity assessed using  $17\beta$ -estradiol (E2) as reference agonist and ICI-182-087 (ICI) as reference antagonist. Androgen activity assessed using dihydrotestosterone (DHT) as reference agonist and hydroxyflutamide (OHF) as reference antagonist. Glucocorticoid activity assessed using dexamethasone (Dex) as reference agonist and mifepristone (Mif) as reference antagonist. Data points represent mean  $\pm$  standard deviation (n=2-3 biological replicates (i.e., unique cell passages), with n=4 technical replicates per dose within a biological replicate).

**Table S1. Identification of genes on custom array plate developed to identify genomic biomarkers of phthalated-induced male reproductive developmental toxicity in fetal rat testis.**

| <b>Symbol</b> | <b>Description</b>                                                    | <b>GenBank</b> |
|---------------|-----------------------------------------------------------------------|----------------|
| Acox1         | Acyl-Coenzyme A oxidase 1, palmitoyl                                  | NM_017340      |
| Actb          | Actin, beta                                                           | NM_031144      |
| Acvr2b        | Activin A receptor, type IIB                                          | NM_031554      |
| Adh1          | Alcohol dehydrogenase 1 (class I)                                     | NM_019286      |
| Aldh1a1       | Aldehyde dehydrogenase 1 family, member A1                            | NM_022407      |
| Amhr2         | Anti-Mullerian hormone receptor, type II                              | NM_030998      |
| Apoa1         | Apolipoprotein A-I                                                    | NM_012738      |
| Ar            | Androgen receptor                                                     | NM_012502      |
| Axin1         | Axin 1                                                                | NM_024405      |
| Axin2         | Axin2                                                                 | NM_024355      |
| B2m           | Beta-2 microglobulin                                                  | NM_012512      |
| Cbx2          | Chromobox homolog 2 (Pc class homolog, Drosophila)                    | XM_221185      |
| Cyp11a1       | Cytochrome P450, family 11, subfamily a, polypeptide 1                | NM_017286      |
| Cyp11b1       | Cytochrome P450, subfamily 11B, polypeptide 1                         | NM_012537      |
| Cyp11b2       | Cytochrome P450, subfamily 11B, polypeptide 2                         | NM_012538      |
| Cyp17a1       | Cytochrome P450, family 17, subfamily a, polypeptide 1                | NM_012753      |
| Cyp4a1        | Cytochrome P450, family 4, subfamily a, polypeptide 1                 | NM_175837      |
| Dhcr7         | 7-dehydrocholesterol reductase                                        | NM_022389      |
| Dhh           | Desert hedgehog homolog (Drosophila)                                  | XM_343327      |
| Dixdc1        | DIX domain containing 1                                               | NM_001037654   |
| Dkk1          | Dickkopf homolog 1 (Xenopus laevis)                                   | XM_219804      |
| Dkk3          | Dickkopf homolog 3 (Xenopus laevis)                                   | NM_138519      |
| Dmrt1         | Doublesex and mab-3 related transcription factor 1                    | NM_053706      |
| Dmrt2         | Doublesex and mab-3 related transcription factor 2                    | XM_219927      |
| Dvl1          | Dishevelled, dsh homolog 1 (Drosophila)                               | NM_031820      |
| Dvl2          | Dishevelled 2, dsh homolog (Drosophila)                               | XM_239254      |
| Dvl3          | Dishevelled, dsh homolog 3 (Drosophila)                               | XM_221304      |
| Emx2          | Empty spiracles homeobox 2                                            | XM_574698      |
| Esr1          | Estrogen receptor 1                                                   | NM_012689      |
| Esr2          | Estrogen receptor 2 (ER beta)                                         | NM_012754      |
| Fabp1         | Fatty acid binding protein 1, liver                                   | NM_012556      |
| Fgf8          | Fibroblast growth factor 8                                            | NM_133286      |
| Fgf9          | Fibroblast growth factor 9                                            | NM_012952      |
| Gata4         | GATA binding protein 4                                                | NM_144730      |
| Gusb          | Glucuronidase, beta                                                   | NM_017015      |
| Hoxa2         | Homeo box A2                                                          | NM_012581      |
| Hsd17b3       | Hydroxysteroid (17-beta) dehydrogenase 3                              | NM_054007      |
| Hsd3b         | 3 beta-hydroxysteroid dehydrogenase/delta-5-delta-4 isomerase type II | NM_001042619   |

|             |                                                                                                                              |              |
|-------------|------------------------------------------------------------------------------------------------------------------------------|--------------|
| Inha        | Inhibin alpha                                                                                                                | NM_012590    |
| Inhba       | Inhibin beta-A                                                                                                               | NM_017128    |
| Inhbb       | Inhibin beta-B                                                                                                               | XM_344130    |
| Insl3       | Insulin-like 3                                                                                                               | NM_053680    |
| Ldha        | Lactate dehydrogenase A                                                                                                      | NM_017025    |
| Lhcgr       | Luteinizing hormone/choriogonadotropin receptor                                                                              | NM_012978    |
| Lhx1        | LIM homeobox 1                                                                                                               | NM_145880    |
| Lhx9        | LIM homeobox 9                                                                                                               | NM_181367    |
| LOC691504   | Similar to Zinc finger protein ZFPM1 (Zinc finger protein multitype 1) (Friend of GATA protein 1) (Friend of GATA-1) (FOG-1) | XR_007127    |
| Mapk3       | Mitogen activated protein kinase 3                                                                                           | NM_017347    |
| Nr0b1       | Nuclear receptor subfamily 0, group B, member 1                                                                              | NM_053317    |
| Nr1d1       | Nuclear receptor subfamily 1, group D, member 1                                                                              | NM_145775    |
| Nr3c1       | Nuclear receptor subfamily 3, group C, member 1                                                                              | NM_012576    |
| Nr3c2       | Nuclear receptor subfamily 3, group C, member 2                                                                              | NM_013131    |
| Nr4a2       | Nuclear receptor subfamily 4, group A, member 2                                                                              | NM_019328    |
| Nr5a1       | Nuclear receptor subfamily 5, group A, member 1                                                                              | XM_001054966 |
| Ntf3        | Neurotrophin 3                                                                                                               | NM_031073    |
| Ntrk3       | Neurotrophic tyrosine kinase, receptor, type 3                                                                               | NM_019248    |
| Pcaf        | P300/CBP-associated factor                                                                                                   | NM_001024252 |
| Pdgfa       | Platelet-derived growth factor alpha polypeptide                                                                             | NM_012801    |
| Pdgfra      | Platelet derived growth factor receptor, alpha polypeptide                                                                   | XM_214030    |
| Pou5f1      | POU class 5 homeobox 1                                                                                                       | NM_001009178 |
| Ppara       | Peroxisome proliferator activated receptor alpha                                                                             | NM_013196    |
| Ppard       | Peroxisome proliferator-activated receptor delta                                                                             | NM_013141    |
| Pparg       | Peroxisome proliferator-activated receptor gamma                                                                             | NM_013124    |
| PPC         | Positive PCR Control                                                                                                         | SA_00103     |
| Ptch1       | Patched homolog 1 (Drosophila)                                                                                               | XM_345570    |
| Ptgds2      | Prostaglandin D2 synthase 2, hematopoietic                                                                                   | NM_031644    |
| Rara        | Retinoic acid receptor, alpha                                                                                                | NM_031528    |
| Rarb        | Retinoic acid receptor, beta                                                                                                 | XM_223843    |
| Rarg_mapped | Retinoic acid receptor, gamma (mapped)                                                                                       | XM_217064    |
| RGD1563046  | Similar to cerberus-like                                                                                                     | XR_008686    |
| RGDC        | Rat Genomic DNA Contamination                                                                                                | U26919       |
| Rhox10      | Reproductive homeobox 10                                                                                                     | NM_001037581 |
| Rhox5       | Reproductive homeobox 5                                                                                                      | NM_022175    |
| RTC         | Reverse Transcription Control                                                                                                | SA_00104     |
| Rxra        | Retinoid X receptor alpha                                                                                                    | NM_012805    |
| Rxrb        | Retinoid X receptor beta                                                                                                     | NM_206849    |
| Rxrg        | Retinoid X receptor gamma                                                                                                    | NM_031765    |
| Scarb1      | Scavenger receptor class B, member 1                                                                                         | NM_031541    |
| Sfrp1       | Secreted frizzled-related protein 1                                                                                          | XM_224987    |
| Sfrp2       | Secreted frizzled-related protein 2                                                                                          | XM_227314    |

|       |                                                                  |              |
|-------|------------------------------------------------------------------|--------------|
| Sfrp4 | Secreted frizzled-related protein 4                              | NM_053544    |
| Sfrp5 | Secreted frizzled-related protein 5                              | XM_219887    |
| Smo   | Smoothened homolog (Drosophila)                                  | NM_012807    |
| Sox8  | SRY (sex determining region Y)-box 8                             | XM_220283    |
| Sox9  | SRY-box containing gene 9                                        | XM_343981    |
| Sra1  | Steroid receptor RNA activator 1                                 | NM_183329    |
| Sry   | Sex determining region Y                                         | NM_012772    |
| Star  | Steroidogenic acute regulatory protein                           | NM_031558    |
| Tgfb1 | Transforming growth factor, beta 1                               | NM_021578    |
| Tle1  | Transducin-like enhancer of split 1 (E(sp1) homolog, Drosophila) | XM_342851    |
| Tle2  | Transducin-like enhancer of split 2 (E(sp1) homolog, Drosophila) | NM_001039013 |
| Tspo  | Translocator protein                                             | NM_012515    |
| Vdr   | Vitamin D (1,25- dihydroxyvitamin D3) receptor                   | NM_017058    |
| Wnt7a | Wingless-type MMTV integration site family, member 7A            | XM_342723    |
| Wt1   | Wilms tumor 1                                                    | NM_031534    |
| Zfpm2 | Zinc finger protein, multitype 2                                 | XM_235253    |

**Table S2. Identification of PPAR pathway genes analyzed in maternal and fetal livers using Qiagen RT<sup>2</sup> Profiler PCR Array Rat PPAR Targets (Cat no. PARN-149Z)**

| Symbol  | Description                                                        | UniGene   | GenBank   |
|---------|--------------------------------------------------------------------|-----------|-----------|
| Acaa2   | Acetyl-Coenzyme A acyltransferase 2                                | Rn.3786   | NM_130433 |
| Acadl   | Acyl-Coenzyme A dehydrogenase, long-chain                          | Rn.174    | NM_012819 |
| Acadm   | Acyl-Coenzyme A dehydrogenase, C-4 to C-12 straight chain          | Rn.6302   | NM_016986 |
| Acox1   | Acyl-Coenzyme A oxidase 1, palmitoyl                               | Rn.31796  | NM_017340 |
| Acox3   | Acyl-Coenzyme A oxidase 3, pristanoyl                              | Rn.10546  | NM_053339 |
| Acs11   | Acyl-CoA synthetase long-chain family member 1                     | Rn.6215   | NM_012820 |
| Acs13   | Acyl-CoA synthetase long-chain family member 3                     | Rn.54820  | NM_057107 |
| Acs14   | Acyl-CoA synthetase long-chain family member 4                     | Rn.87821  | NM_053623 |
| Acs15   | Acyl-CoA synthetase long-chain family member 5                     | Rn.105862 | NM_053607 |
| Adipoq  | Adiponectin, C1Q and collagen domain containing                    | Rn.24299  | NM_144744 |
| Angptl4 | Angiopietin-like 4                                                 | Rn.119611 | NM_199115 |
| Apoa1   | Apolipoprotein A-I                                                 | Rn.10308  | NM_012738 |
| Apoa5   | Apolipoprotein A-V                                                 | Rn.48763  | NM_080576 |
| Apoc3   | Apolipoprotein C-III                                               | Rn.195323 | NM_012501 |
| Apoe    | Apolipoprotein E                                                   | Rn.32351  | NM_138828 |
| Aqp7    | Aquaporin 7                                                        | Rn.11111  | NM_019157 |
| Cd36    | CD36 molecule (thrombospondin receptor)                            | Rn.102418 | NM_031561 |
| Clu     | Clusterin                                                          | Rn.1780   | NM_053021 |
| Cpt1a   | Carnitine palmitoyltransferase 1a, liver                           | Rn.2856   | NM_031559 |
| Cpt1b   | Carnitine palmitoyltransferase 1b, muscle                          | Rn.6028   | NM_013200 |
| Cpt2    | Carnitine palmitoyltransferase 2                                   | Rn.11389  | NM_012930 |
| Creb1   | CAMP responsive element binding protein 1                          | Rn.90061  | NM_031017 |
| Crebbp  | CREB binding protein                                               | Rn.108128 | NM_133381 |
| Cyp27a1 | Cytochrome P450, family 27, subfamily a, polypeptide 1             | Rn.94956  | NM_178847 |
| Cyp7a1  | Cytochrome P450, family 7, subfamily a, polypeptide 1              | Rn.10737  | NM_012942 |
| Dgat1   | Diacylglycerol O-acyltransferase homolog 1 (mouse)                 | Rn.252    | NM_053437 |
| Ech1    | Enoyl coenzyme A hydratase 1, peroxisomal                          | Rn.6148   | NM_022594 |
| Ehhadh  | Enoyl-Coenzyme A, hydratase/3-hydroxyacyl Coenzyme A dehydrogenase | Rn.3671   | NM_133606 |
| Eln     | Elastin                                                            | Rn.54384  | NM_012722 |
| Ep300   | E1A binding protein p300                                           | Rn.12447  | XM_576312 |
| Etfdh   | Electron-transferring-flavoprotein dehydrogenase                   | Rn.37277  | NM_198742 |
| Fabp1   | Fatty acid binding protein 1, liver                                | Rn.36412  | NM_012556 |
| Fabp2   | Fatty acid binding protein 2, intestinal                           | Rn.91358  | NM_013068 |
| Fabp3   | Fatty acid binding protein 3, muscle and heart                     | Rn.32566  | NM_024162 |
| Fabp4   | Fatty acid binding protein 4, adipocyte                            | Rn.4258   | NM_053365 |
| Fabp5   | Fatty acid binding protein 5, epidermal                            | Rn.98269  | NM_145878 |
| Fabp6   | Fatty acid binding protein 6, ileal                                | Rn.10008  | NM_017098 |
| Fabp7   | Fatty acid binding protein 7, brain                                | Rn.10014  | NM_030832 |
| Fads2   | Fatty acid desaturase 2                                            | Rn.162483 | NM_031344 |



|          |                                                                                                   |           |              |
|----------|---------------------------------------------------------------------------------------------------|-----------|--------------|
| Fgr      | Gardner-Rasheed feline sarcoma viral (v-fgr) oncogene homolog                                     | Rn.11309  | NM_024145    |
| Gk       | Glycerol kinase                                                                                   | Rn.153497 | NM_024381    |
| Hif1a    | Hypoxia-inducible factor 1, alpha subunit (basic helix-loop-helix transcription factor)           | Rn.10852  | NM_024359    |
| Hmgcs2   | 3-hydroxy-3-methylglutaryl-Coenzyme A synthase 2 (mitochondrial)                                  | Rn.29594  | NM_173094    |
| Hspd1    | Heat shock protein 1 (chaperonin)                                                                 | Rn.102058 | NM_022229    |
| Ilk      | Integrin-linked kinase                                                                            | Rn.95042  | NM_133409    |
| Klf10    | Kruppel-like factor 10                                                                            | Rn.2398   | NM_031135    |
| Lpin1    | Lipin 1                                                                                           | Rn.214286 | NM_001012111 |
| Lpl      | Lipoprotein lipase                                                                                | Rn.3834   | NM_012598    |
| Med1     | Mediator complex subunit 1                                                                        | Rn.4262   | NM_001134361 |
| Mlycd    | Malonyl-CoA decarboxylase                                                                         | Rn.13468  | NM_053477    |
| Mmp9     | Matrix metalloproteinase 9                                                                        | Rn.10209  | NM_031055    |
| Ncoa3    | Nuclear receptor coactivator 3                                                                    | Rn.20691  | XM_215947    |
| Ncoa6    | Nuclear receptor coactivator 6                                                                    | Rn.9077   | XM_342552    |
| Nr1h3    | Nuclear receptor subfamily 1, group H, member 3                                                   | Rn.11209  | NM_031627    |
| Olr1     | Oxidized low density lipoprotein (lectin-like) receptor 1                                         | Rn.87449  | NM_133306    |
| Pck1     | Phosphoenolpyruvate carboxykinase 1 (soluble)                                                     | Rn.104376 | NM_198780    |
| Pck2     | Phosphoenolpyruvate carboxykinase 2 (mitochondrial)                                               | Rn.35508  | NM_001108377 |
| Pdpk1    | 3-phosphoinositide dependent protein kinase-1                                                     | Rn.10905  | NM_031081    |
| Pltp     | Phospholipid transfer protein                                                                     | Rn.117434 | NM_001168543 |
| Ppara    | Peroxisome proliferator activated receptor alpha                                                  | Rn.9753   | NM_013196    |
| Ppard    | Peroxisome proliferator-activated receptor delta                                                  | Rn.96181  | NM_013141    |
| Pparg    | Peroxisome proliferator-activated receptor gamma                                                  | Rn.23443  | NM_013124    |
| Ppargc1a | Peroxisome proliferator-activated receptor gamma, coactivator 1 alpha                             | Rn.19172  | NM_031347    |
| Ppargc1b | Peroxisome proliferator-activated receptor gamma, coactivator 1 beta                              | Rn.163382 | NM_176075    |
| Pprc1    | Peroxisome proliferator-activated receptor gamma, coactivator-related 1                           | Rn.9484   | NM_001106363 |
| Pten     | Phosphatase and tensin homolog                                                                    | Rn.22158  | NM_031606    |
| Pyv      | Peptide YY (mapped)                                                                               | Rn.13173  | NM_001034080 |
| Rxra     | Retinoid X receptor alpha                                                                         | Rn.108206 | NM_012805    |
| Rxrb     | Retinoid X receptor beta                                                                          | Rn.49295  | NM_206849    |
| Rxrg     | Retinoid X receptor gamma                                                                         | Rn.40816  | NM_031765    |
| Scd1     | Stearoyl-Coenzyme A desaturase 1                                                                  | Rn.1023   | NM_139192    |
| Sirt1    | Sirtuin (silent mating type information regulation 2 homolog) 1 (S. cerevisiae)                   | Rn.219976 | NM_001107627 |
| Slc22a5  | Solute carrier family 22 (organic cation/carnitine transporter), member 5                         | Rn.8844   | NM_019269    |
| Slc27a1  | Solute carrier family 27 (fatty acid transporter), member 1                                       | Rn.1047   | NM_053580    |
| Slc27a2  | Solute carrier family 27 (fatty acid transporter), member 2                                       | Rn.3608   | NM_031736    |
| Slc27a4  | Solute carrier family 27 (fatty acid transporter), member 4                                       | Rn.145068 | XM_231115    |
| Slc27a5  | Solute carrier family 27 (fatty acid transporter), member 5                                       | Rn.207896 | NM_024143    |
| Slc27a6  | Solute carrier family 27 (fatty acid transporter), member 6                                       | Rn.53815  | NM_001106145 |
| Smardc3  | SWI/SNF related, matrix associated, actin dependent regulator of chromatin, subfamily d, member 3 | Rn.20043  | NM_001011966 |
| Sorbs1   | Sorbin and SH3 domain containing 1                                                                | Rn.110441 | XM_001066536 |

|       |                                                                   |           |              |
|-------|-------------------------------------------------------------------|-----------|--------------|
| Src   | V-src sarcoma (Schmidt-Ruppin A-2) viral oncogene homolog (avian) | Rn.112600 | NM_031977    |
| Tgs1  | Trimethylguanosine synthase homolog ( <i>S. cerevisiae</i> )      | Rn.48378  | NM_001107904 |
| Txnip | Thioredoxin interacting protein                                   | Rn.2758   | NM_001008767 |
| Ucp1  | Uncoupling protein 1 (mitochondrial, proton carrier)              | Rn.10281  | NM_012682    |
| Actb  | Actin, beta                                                       | Rn.94978  | NM_031144    |
| B2m   | Beta-2 microglobulin                                              | Rn.1868   | NM_012512    |
| Hprt1 | Hypoxanthine phosphoribosyltransferase 1                          | Rn.47     | NM_012583    |
| Ldha  | Lactate dehydrogenase A                                           | Rn.107896 | NM_017025    |
| Rplp1 | Ribosomal protein, large, P1                                      | Rn.973    | NM_001007604 |
| RGDC  | Rat Genomic DNA Contamination                                     | N/A       | U26919       |
| RTC   | Reverse Transcription Control                                     | N/A       | SA_00104     |
| PPC   | Positive PCR Control                                              | N/A       | SA_00103     |

PPAR=peroxisome proliferator activated receptor; PCR=polymerase chain reaction

**Table S3. Fetal liver (collected GD18) PPAR gene expression following GD14-18 maternal oral exposure to HFPO-DA.**

| Gene    | HFPO-DA dose (mg/kg/d) |               |               |               |                |                |                |                |                |
|---------|------------------------|---------------|---------------|---------------|----------------|----------------|----------------|----------------|----------------|
|         | 0                      | 1             | 3             | 10            | 30             | 62.5           | 125            | 250            | 500            |
| Acaa2   | 1.0 ± 0.0 (6)          | 1.2 ± 0.1 (3) | 1.2 ± 0.1 (3) | 1.8 ± 0.1 (3) | 2.3 ± 0.2 (3)  | 2.5 ± 0.2 (3)  | 3.2 ± 0.2 (3)  | 3.3 ± 0.0 (3)  | 3.4 ± 0.2 (3)  |
| Acadl   | 1.0 ± 0.0 (6)          | 1.0 ± 0.0 (3) | 1.1 ± 0.0 (3) | 1.3 ± 0.0 (3) | 1.4 ± 0.0 (3)  | 1.5 ± 0.1 (3)  | 1.9 ± 0.1 (3)  | 2.0 ± 0.0 (3)  | 2.2 ± 0.1 (3)  |
| Acadm   | 1.0 ± 0.0 (6)          | 1.0 ± 0.1 (3) | 1.1 ± 0.1 (3) | 1.4 ± 0.0 (3) | 1.7 ± 0.0 (3)  | 1.9 ± 0.0 (3)  | 2.4 ± 0.1 (3)  | 2.3 ± 0.1 (3)  | 2.5 ± 0.2 (3)  |
| Acox1   | 1.0 ± 0.0 (6)          | 1.2 ± 0.0 (3) | 1.5 ± 0.0 (3) | 2.3 ± 0.2 (3) | 3.7 ± 0.1 (3)  | 5.7 ± 0.4 (3)  | 8.3 ± 0.3 (3)  | 8.5 ± 0.6 (3)  | 9.2 ± 0.8 (3)  |
| Acox3   | 1.0 ± 0.0 (6)          | 1.1 ± 0.1 (3) | 1.3 ± 0.1 (3) | 1.1 ± 0.1 (3) | 1.2 ± 0.1 (3)  | 1.0 ± 0.0 (3)  | 1.2 ± 0.1 (3)  | 1.0 ± 0.0 (3)  | 1.1 ± 0.1 (3)  |
| Acs11   | 1.0 ± 0.0 (6)          | 1.1 ± 0.0 (3) | 1.3 ± 0.1 (3) | 1.8 ± 0.1 (3) | 2.4 ± 0.0 (3)  | 2.5 ± 0.1 (3)  | 2.9 ± 0.0 (3)  | 2.7 ± 0.1 (3)  | 2.8 ± 0.2 (3)  |
| Acs13   | 1.0 ± 0.0 (6)          | 1.0 ± 0.0 (3) | 1.0 ± 0.0 (3) | 1.1 ± 0.1 (3) | 1.2 ± 0.0 (3)  | 1.3 ± 0.1 (3)  | 1.4 ± 0.0 (3)  | 1.5 ± 0.0 (3)  | 1.5 ± 0.1 (3)  |
| Acs14   | 1.0 ± 0.0 (6)          | 1.0 ± 0.1 (3) | 1.0 ± 0.1 (3) | 1.2 ± 0.0 (3) | 1.5 ± 0.0 (3)  | 1.6 ± 0.1 (3)  | 1.7 ± 0.0 (3)  | 1.7 ± 0.1 (3)  | 1.7 ± 0.1 (3)  |
| Acs15   | 1.0 ± 0.0 (6)          | 0.8 ± 0.0 (3) | 0.8 ± 0.1 (3) | 0.9 ± 0.0 (3) | 0.9 ± 0.1 (3)  | 0.9 ± 0.1 (3)  | 1.1 ± 0.0 (3)  | 1.0 ± 0.0 (3)  | 0.9 ± 0.1 (3)  |
| Adipoq  | n/a                    | n/a           | n/a           | n/a           | n/a            | n/a            | n/a            | n/a            | n/a            |
| Angptl4 | 1.0 ± 0.1 (6)          | 1.6 ± 0.2 (3) | 3.8 ± 0.4 (3) | 6.2 ± 0.7 (3) | 11.3 ± 0.6 (3) | 17.0 ± 0.4 (3) | 19.5 ± 0.2 (3) | 17.3 ± 1.0 (3) | 17.0 ± 2.0 (3) |
| Apoa1   | 1.0 ± 0.0 (6)          | 1.1 ± 0.1 (3) | 1.2 ± 0.1 (3) | 1.1 ± 0.0 (3) | 0.9 ± 0.1 (3)  | 1.2 ± 0.0 (3)  | 1.0 ± 0.1 (3)  | 1.2 ± 0.1 (3)  | 1.5 ± 0.1 (3)  |
| Apoa5   | 1.0 ± 0.1 (6)          | 1.4 ± 0.1 (3) | 1.3 ± 0.4 (3) | 1.4 ± 0.0 (3) | 1.5 ± 0.1 (3)  | 1.3 ± 0.4 (3)  | 1.6 ± 0.2 (3)  | 1.0 ± 0.2 (3)  | 1.3 ± 0.2 (3)  |
| Apoc3   | 1.0 ± 0.1 (6)          | 1.2 ± 0.2 (3) | 1.4 ± 0.3 (3) | 1.3 ± 0.3 (3) | 1.0 ± 0.2 (3)  | 1.1 ± 0.3 (3)  | 1.3 ± 0.3 (3)  | 0.9 ± 0.1 (3)  | 1.3 ± 0.2 (3)  |
| ApoE    | 1.0 ± 0.0 (6)          | 1.1 ± 0.0 (3) | 1.1 ± 0.1 (3) | 1.1 ± 0.0 (3) | 1.1 ± 0.1 (3)  | 0.9 ± 0.0 (3)  | 1.0 ± 0.1 (3)  | 1.0 ± 0.1 (3)  | 1.2 ± 0.1 (3)  |
| Aqp7    | 1.0 ± 0.0 (6)          | 1.0 ± 0.1 (3) | 1.0 ± 0.1 (3) | 1.3 ± 0.1 (3) | 1.5 ± 0.1 (3)  | 1.6 ± 0.0 (3)  | 1.7 ± 0.1 (3)  | 1.6 ± 0.2 (3)  | 1.8 ± 0.0 (3)  |
| Cd36    | 1.0 ± 0.0 (6)          | 0.8 ± 0.1 (3) | 0.8 ± 0.2 (3) | 0.8 ± 0.1 (3) | 0.9 ± 0.1 (3)  | 0.8 ± 0.1 (3)  | 0.8 ± 0.0 (3)  | 0.8 ± 0.0 (3)  | 0.8 ± 0.0 (3)  |
| Clu     | 1.0 ± 0.1 (6)          | 1.1 ± 0.1 (3) | 1.4 ± 0.1 (3) | 1.1 ± 0.0 (3) | 1.1 ± 0.1 (3)  | 1.4 ± 0.0 (3)  | 1.3 ± 0.1 (3)  | 1.1 ± 0.1 (3)  | 1.2 ± 0.2 (3)  |
| Cpt1a   | 1.0 ± 0.1 (6)          | 1.3 ± 0.1 (3) | 2.0 ± 0.1 (3) | 3.4 ± 0.5 (3) | 4.6 ± 0.1 (3)  | 6.2 ± 0.4 (3)  | 9.7 ± 1.8 (3)  | 11.2 ± 1.7 (3) | 9.9 ± 1.5 (3)  |
| Cpt1b   | 1.0 ± 0.1 (6)          | 1.7 ± 0.4 (3) | 3.0 ± 0.4 (3) | 3.5 ± 0.4 (3) | 8.6 ± 0.8 (3)  | 10.3 ± 0.3 (3) | 16.7 ± 0.4 (3) | 16.4 ± 0.9 (3) | 21.2 ± 1.9 (3) |
| Cpt2    | 1.0 ± 0.0 (6)          | 1.2 ± 0.1 (3) | 1.4 ± 0.1 (3) | 2.1 ± 0.2 (3) | 2.9 ± 0.1 (3)  | 3.2 ± 0.1 (3)  | 4.1 ± 0.1 (3)  | 4.0 ± 0.2 (3)  | 4.3 ± 0.4 (3)  |
| Creb1   | 1.0 ± 0.0 (6)          | 1.0 ± 0.1 (3) | 1.1 ± 0.0 (3) | 1.0 ± 0.1 (3) | 1.0 ± 0.1 (3)  | 0.9 ± 0.1 (3)  | 0.9 ± 0.0 (3)  | 0.8 ± 0.0 (3)  | 0.9 ± 0.0 (3)  |
| Crebbp  | 1.0 ± 0.0 (6)          | 1.0 ± 0.1 (3) | 1.1 ± 0.1 (3) | 1.0 ± 0.1 (3) | 1.0 ± 0.0 (3)  | 0.9 ± 0.1 (3)  | 1.0 ± 0.0 (3)  | 1.0 ± 0.0 (3)  | 1.0 ± 0.1 (3)  |
| Cyp27a1 | 1.0 ± 0.0 (6)          | 1.1 ± 0.1 (3) | 1.1 ± 0.2 (3) | 1.0 ± 0.1 (3) | 1.1 ± 0.1 (3)  | 0.9 ± 0.0 (3)  | 1.0 ± 0.0 (3)  | 1.0 ± 0.0 (3)  | 1.1 ± 0.1 (3)  |
| Cyp7a1  | 1.0 ± 0.2 (6)          | 1.3 ± 0.3 (3) | 0.9 ± 0.1 (3) | 1.6 ± 0.7 (3) | 1.1 ± 0.4 (3)  | 0.4 ± 0.0 (3)  | 0.5 ± 0.0 (3)  | 0.6 ± 0.2 (3)  | 0.6 ± 0.1 (3)  |
| Dgat1   | 1.0 ± 0.0 (6)          | 1.1 ± 0.1 (3) | 1.2 ± 0.1 (3) | 1.4 ± 0.0 (3) | 1.5 ± 0.1 (3)  | 1.2 ± 0.0 (3)  | 1.5 ± 0.1 (3)  | 1.5 ± 0.1 (3)  | 1.5 ± 0.0 (3)  |
| Ech1    | 1.0 ± 0.0 (6)          | 1.1 ± 0.1 (3) | 1.2 ± 0.0 (3) | 1.5 ± 0.2 (3) | 2.1 ± 0.1 (3)  | 2.6 ± 0.2 (3)  | 4.6 ± 0.4 (3)  | 4.3 ± 0.4 (3)  | 6.5 ± 1.0 (3)  |

|        |               |               |               |                 |                |                  |                 |                  |                  |
|--------|---------------|---------------|---------------|-----------------|----------------|------------------|-----------------|------------------|------------------|
| Ehhadh | 1.0 ± 0.1 (6) | 1.6 ± 0.2 (3) | 4.6 ± 0.4 (3) | 30.5 ± 12.2 (3) | 81.2 ± 9.6 (3) | 144.8 ± 15.1 (3) | 214.8 ± 7.5 (3) | 252.3 ± 31.6 (3) | 321.0 ± 33.8 (3) |
| Eln    | 1.0 ± 0.1 (6) | 1.2 ± 0.3 (3) | 1.6 ± 0.3 (3) | 1.0 ± 0.1 (3)   | 1.0 ± 0.3 (3)  | 1.3 ± 0.0 (3)    | 1.1 ± 0.2 (3)   | 1.5 ± 0.1 (3)    | 1.4 ± 0.3 (3)    |
| Ep300  | 1.0 ± 0.0 (6) | 1.0 ± 0.1 (3) | 1.2 ± 0.0 (3) | 1.0 ± 0.0 (3)   | 1.0 ± 0.0 (3)  | 0.9 ± 0.0 (3)    | 1.0 ± 0.0 (3)   | 0.9 ± 0.0 (3)    | 0.9 ± 0.0 (3)    |
| Etfdh  | 1.0 ± 0.1 (6) | 1.0 ± 0.1 (3) | 1.2 ± 0.0 (3) | 1.7 ± 0.1 (3)   | 2.1 ± 0.1 (3)  | 2.7 ± 0.1 (3)    | 3.5 ± 0.2 (3)   | 3.6 ± 0.2 (3)    | 4.1 ± 0.3 (3)    |
| Fabp1  | 1.0 ± 0.1 (6) | 1.8 ± 0.5 (3) | 3.3 ± 0.7 (3) | 10.9 ± 2.6 (3)  | 28.3 ± 0.5 (3) | 56.6 ± 0.8 (3)   | 77.8 ± 3.5 (3)  | 88.3 ± 4.0 (3)   | 105.3 ± 8.0 (3)  |
| Fabp2  | 1.0 ± 0.1 (6) | 0.9 ± 0.2 (3) | 1.0 ± 0.1 (3) | 1.0 ± 0.1 (3)   | 1.1 ± 0.0 (3)  | 1.0 ± 0.0 (3)    | 0.7 ± 0.0 (3)   | 0.9 ± 0.0 (3)    | 1.0 ± 0.2 (3)    |
| Fabp3  | 1.0 ± 0.1 (6) | 1.0 ± 0.0 (3) | 1.2 ± 0.1 (3) | 1.1 ± 0.1 (3)   | 1.1 ± 0.1 (3)  | 0.8 ± 0.0 (3)    | 1.0 ± 0.1 (3)   | 1.0 ± 0.0 (3)    | 1.0 ± 0.1 (3)    |
| Fabp4  | 1.0 ± 0.1 (6) | 1.4 ± 0.2 (3) | 1.5 ± 0.0 (3) | 1.2 ± 0.1 (3)   | 1.2 ± 0.0 (3)  | 0.9 ± 0.1 (3)    | 0.9 ± 0.1 (3)   | 1.0 ± 0.1 (3)    | 1.5 ± 0.2 (3)    |
| Fabp5  | 1.0 ± 0.0 (6) | 1.1 ± 0.2 (3) | 1.0 ± 0.0 (3) | 1.1 ± 0.0 (3)   | 1.1 ± 0.1 (3)  | 1.3 ± 0.1 (3)    | 1.4 ± 0.0 (3)   | 1.5 ± 0.1 (3)    | 1.8 ± 0.2 (3)    |
| Fabp6  | n/a           | n/a           | n/a           | n/a             | n/a            | n/a              | n/a             | n/a              | n/a              |
| Fabp7  | 1.0 ± 0.1 (6) | 1.0 ± 0.2 (3) | 1.0 ± 0.0 (3) | 1.3 ± 0.1 (3)   | 1.4 ± 0.1 (3)  | 1.3 ± 0.2 (3)    | 1.8 ± 0.3 (3)   | 1.8 ± 0.2 (3)    | 1.9 ± 0.3 (3)    |
| Fads2  | 1.0 ± 0.0 (6) | 1.1 ± 0.1 (3) | 1.2 ± 0.0 (3) | 1.1 ± 0.1 (3)   | 1.6 ± 0.1 (3)  | 1.8 ± 0.1 (3)    | 2.0 ± 0.2 (3)   | 2.2 ± 0.0 (3)    | 2.1 ± 0.0 (3)    |
| Fgr    | 1.0 ± 0.0 (6) | 0.9 ± 0.1 (3) | 1.3 ± 0.2 (3) | 1.0 ± 0.1 (3)   | 1.1 ± 0.2 (3)  | 0.9 ± 0.1 (3)    | 1.1 ± 0.2 (3)   | 0.9 ± 0.2 (3)    | 0.8 ± 0.2 (3)    |
| Gk     | 1.0 ± 0.1 (6) | 1.0 ± 0.1 (3) | 1.0 ± 0.1 (3) | 1.2 ± 0.1 (3)   | 1.4 ± 0.1 (3)  | 1.4 ± 0.2 (3)    | 1.9 ± 0.1 (3)   | 1.7 ± 0.0 (3)    | 2.0 ± 0.2 (3)    |
| Hif1a  | 1.0 ± 0.0 (6) | 1.0 ± 0.0 (3) | 1.1 ± 0.0 (3) | 1.2 ± 0.1 (3)   | 1.1 ± 0.0 (3)  | 1.0 ± 0.1 (3)    | 1.0 ± 0.0 (3)   | 1.0 ± 0.0 (3)    | 1.0 ± 0.1 (3)    |
| Hmgcs2 | 1.0 ± 0.0 (6) | 0.7 ± 0.3 (3) | 2.9 ± 0.4 (3) | 4.6 ± 0.7 (3)   | 8.0 ± 0.1 (3)  | 16.7 ± 0.1 (3)   | 20.9 ± 0.4 (3)  | 22.0 ± 0.1 (3)   | 22.7 ± 2.0 (3)   |
| Hspd1  | 1.0 ± 0.0 (6) | 1.1 ± 0.1 (3) | 1.0 ± 0.0 (3) | 1.2 ± 0.1 (3)   | 1.2 ± 0.1 (3)  | 1.0 ± 0.0 (3)    | 1.0 ± 0.0 (3)   | 1.0 ± 0.1 (3)    | 1.3 ± 0.2 (3)    |
| Ilk    | 1.0 ± 0.0 (6) | 1.0 ± 0.0 (3) | 1.2 ± 0.0 (3) | 1.1 ± 0.1 (3)   | 1.0 ± 0.1 (3)  | 1.0 ± 0.1 (3)    | 1.0 ± 0.0 (3)   | 1.0 ± 0.1 (3)    | 1.0 ± 0.0 (3)    |
| Klf10  | 1.0 ± 0.0 (6) | 1.0 ± 0.2 (3) | 1.1 ± 0.1 (3) | 1.1 ± 0.0 (3)   | 1.0 ± 0.1 (3)  | 1.5 ± 0.2 (3)    | 1.7 ± 0.1 (3)   | 1.6 ± 0.0 (3)    | 1.4 ± 0.2 (3)    |
| Lpin1  | 1.0 ± 0.0 (6) | 1.0 ± 0.2 (3) | 1.2 ± 0.3 (3) | 0.8 ± 0.0 (3)   | 0.9 ± 0.1 (3)  | 1.0 ± 0.1 (3)    | 1.0 ± 0.0 (3)   | 1.2 ± 0.0 (3)    | 1.3 ± 0.2 (3)    |
| Lpl    | 1.0 ± 0.0 (6) | 1.0 ± 0.0 (3) | 1.1 ± 0.0 (3) | 1.2 ± 0.0 (3)   | 1.4 ± 0.2 (3)  | 1.3 ± 0.0 (3)    | 1.5 ± 0.0 (3)   | 1.5 ± 0.0 (3)    | 1.4 ± 0.1 (3)    |
| Med1   | 1.0 ± 0.1 (6) | 1.0 ± 0.0 (3) | 1.1 ± 0.0 (3) | 1.1 ± 0.0 (3)   | 0.9 ± 0.1 (3)  | 0.9 ± 0.1 (3)    | 0.9 ± 0.0 (3)   | 1.0 ± 0.0 (3)    | 0.9 ± 0.1 (3)    |
| Mlycd  | 1.0 ± 0.1 (6) | 0.9 ± 0.1 (3) | 1.0 ± 0.1 (3) | 1.2 ± 0.0 (3)   | 1.4 ± 0.1 (3)  | 2.3 ± 0.1 (3)    | 2.6 ± 0.2 (3)   | 2.4 ± 0.2 (3)    | 2.1 ± 0.1 (3)    |
| Mmp9   | 1.0 ± 0.1 (6) | 1.2 ± 0.2 (3) | 1.5 ± 0.3 (3) | 1.0 ± 0.2 (3)   | 1.2 ± 0.3 (3)  | 1.0 ± 0.1 (3)    | 1.1 ± 0.1 (3)   | 1.0 ± 0.2 (3)    | 0.9 ± 0.2 (3)    |
| Ncoa3  | 1.0 ± 0.0 (6) | 1.0 ± 0.1 (3) | 1.3 ± 0.1 (3) | 1.0 ± 0.1 (3)   | 1.0 ± 0.0 (3)  | 0.9 ± 0.1 (3)    | 0.9 ± 0.0 (3)   | 1.0 ± 0.0 (3)    | 0.9 ± 0.0 (3)    |
| Ncoa6  | 1.0 ± 0.0 (6) | 1.0 ± 0.0 (3) | 1.1 ± 0.0 (3) | 0.9 ± 0.2 (3)   | 1.0 ± 0.0 (3)  | 0.9 ± 0.1 (3)    | 0.9 ± 0.1 (3)   | 0.9 ± 0.0 (3)    | 0.9 ± 0.1 (3)    |
| Nr1h3  | 1.0 ± 0.1 (6) | 1.1 ± 0.1 (3) | 1.1 ± 0.1 (3) | 1.1 ± 0.1 (3)   | 1.1 ± 0.1 (3)  | 1.1 ± 0.1 (3)    | 1.2 ± 0.1 (3)   | 1.2 ± 0.0 (3)    | 1.0 ± 0.0 (3)    |
| Olr1   | n/a           | n/a           | n/a           | n/a             | n/a            | n/a              | n/a             | n/a              | n/a              |
| Pck1   | 1.0 ± 0.1 (6) | 1.5 ± 0.2 (3) | 1.6 ± 0.3 (3) | 3.0 ± 1.2 (3)   | 4.4 ± 1.5 (3)  | 6.6 ± 1.6 (3)    | 11.8 ± 3.3 (3)  | 8.8 ± 1.7 (3)    | 26.6 ± 13.4 (3)  |
| Pck2   | 1.0 ± 0.0 (6) | 0.9 ± 0.1 (3) | 1.1 ± 0.0 (3) | 0.9 ± 0.1 (3)   | 0.9 ± 0.1 (3)  | 1.0 ± 0.1 (3)    | 0.9 ± 0.1 (3)   | 0.9 ± 0.0 (3)    | 1.0 ± 0.0 (3)    |

|          |               |               |               |               |               |               |               |               |               |
|----------|---------------|---------------|---------------|---------------|---------------|---------------|---------------|---------------|---------------|
| Pdpk1    | 1.0 ± 0.0 (6) | 0.9 ± 0.1 (3) | 1.1 ± 0.1 (3) | 1.1 ± 0.0 (3) | 0.8 ± 0.0 (3) | 1.0 ± 0.0 (3) | 1.0 ± 0.1 (3) | 0.9 ± 0.0 (3) | 1.0 ± 0.0 (3) |
| Pltp     | 1.0 ± 0.1 (6) | 1.0 ± 0.2 (3) | 1.5 ± 0.1 (3) | 1.0 ± 0.1 (3) | 1.4 ± 0.0 (3) | 1.0 ± 0.0 (3) | 1.0 ± 0.0 (3) | 1.1 ± 0.1 (3) | 1.0 ± 0.2 (3) |
| Ppara    | 1.0 ± 0.1 (6) | 1.1 ± 0.1 (3) | 1.2 ± 0.1 (3) | 1.1 ± 0.0 (3) | 0.9 ± 0.0 (3) | 1.2 ± 0.1 (3) | 1.4 ± 0.0 (3) | 1.3 ± 0.1 (3) | 1.3 ± 0.2 (3) |
| Ppard    | 1.0 ± 0.1 (6) | 0.9 ± 0.1 (3) | 1.4 ± 0.1 (3) | 1.1 ± 0.1 (3) | 1.0 ± 0.1 (3) | 1.1 ± 0.0 (3) | 1.2 ± 0.1 (3) | 1.2 ± 0.0 (3) | 1.0 ± 0.2 (3) |
| Pparg    | n/a           |
| Ppargc1a | 1.0 ± 0.0 (6) | 0.9 ± 0.1 (3) | 1.0 ± 0.1 (3) | 0.7 ± 0.0 (3) | 0.7 ± 0.1 (3) | 0.6 ± 0.0 (3) | 0.5 ± 0.0 (3) | 0.6 ± 0.0 (3) | 0.6 ± 0.0 (3) |
| Ppargc1b | 1.0 ± 0.1 (6) | 1.1 ± 0.2 (3) | 1.3 ± 0.1 (3) | 1.2 ± 0.1 (3) | 1.1 ± 0.1 (3) | 0.9 ± 0.1 (3) | 1.1 ± 0.0 (3) | 1.0 ± 0.1 (3) | 1.0 ± 0.1 (3) |
| Pprc1    | 1.0 ± 0.0 (6) | 1.0 ± 0.1 (3) | 1.1 ± 0.1 (3) | 1.0 ± 0.1 (3) | 1.0 ± 0.1 (3) | 0.9 ± 0.1 (3) | 0.9 ± 0.0 (3) | 0.9 ± 0.0 (3) | 1.2 ± 0.1 (3) |
| Pten     | 1.0 ± 0.1 (6) | 0.9 ± 0.1 (3) | 1.0 ± 0.1 (3) | 1.1 ± 0.1 (3) | 0.8 ± 0.0 (3) | 0.9 ± 0.1 (3) | 1.0 ± 0.1 (3) | 1.0 ± 0.0 (3) | 1.0 ± 0.0 (3) |
| Pyy      | 1.0 ± 0.1 (6) | 1.1 ± 0.2 (3) | 1.0 ± 0.3 (3) | 0.8 ± 0.2 (3) | 0.9 ± 0.2 (3) | 0.8 ± 0.0 (3) | 1.0 ± 0.1 (3) | 3.2 ± 1.2 (3) | 2.9 ± 1.7 (3) |
| Rxra     | 1.0 ± 0.0 (6) | 1.0 ± 0.1 (3) | 1.2 ± 0.0 (3) | 1.1 ± 0.1 (3) | 1.1 ± 0.0 (3) | 1.0 ± 0.0 (3) | 1.1 ± 0.0 (3) | 1.1 ± 0.0 (3) | 1.0 ± 0.0 (3) |
| Rxrb     | 1.0 ± 0.0 (6) | 1.0 ± 0.2 (3) | 1.2 ± 0.1 (3) | 1.0 ± 0.0 (3) | 1.1 ± 0.1 (3) | 0.9 ± 0.0 (3) | 0.9 ± 0.0 (3) | 1.0 ± 0.0 (3) | 0.9 ± 0.0 (3) |
| Rxrg     | 1.0 ± 0.0 (6) | 1.5 ± 0.3 (3) | 1.2 ± 0.0 (3) | 2.2 ± 0.5 (3) | 4.0 ± 0.3 (3) | 4.4 ± 0.8 (3) | 4.9 ± 0.2 (3) | 3.4 ± 0.1 (3) | 3.4 ± 0.3 (3) |
| Scd1     | 1.0 ± 0.0 (6) | 1.1 ± 0.1 (3) | 1.3 ± 0.1 (3) | 1.4 ± 0.2 (3) | 1.7 ± 0.2 (3) | 2.4 ± 0.2 (3) | 2.9 ± 0.1 (3) | 3.6 ± 0.4 (3) | 3.6 ± 0.3 (3) |
| Sirt1    | 1.0 ± 0.0 (6) | 0.9 ± 0.0 (3) | 1.0 ± 0.0 (3) | 1.0 ± 0.0 (3) | 0.8 ± 0.0 (3) | 0.9 ± 0.1 (3) | 1.0 ± 0.0 (3) | 0.8 ± 0.0 (3) | 0.9 ± 0.0 (3) |
| Slc22a5  | 1.0 ± 0.0 (6) | 1.0 ± 0.2 (3) | 1.6 ± 0.1 (3) | 1.7 ± 0.1 (3) | 2.6 ± 0.3 (3) | 2.4 ± 0.4 (3) | 3.4 ± 0.6 (3) | 3.2 ± 0.3 (3) | 2.9 ± 0.1 (3) |
| Slc27a1  | 1.0 ± 0.0 (6) | 1.0 ± 0.1 (3) | 1.1 ± 0.0 (3) | 1.0 ± 0.1 (3) | 1.1 ± 0.1 (3) | 0.9 ± 0.0 (3) | 0.9 ± 0.0 (3) | 1.0 ± 0.1 (3) | 1.0 ± 0.1 (3) |
| Slc27a2  | 1.0 ± 0.0 (6) | 1.0 ± 0.0 (3) | 1.2 ± 0.0 (3) | 1.6 ± 0.1 (3) | 1.8 ± 0.1 (3) | 2.1 ± 0.1 (3) | 2.4 ± 0.1 (3) | 2.5 ± 0.0 (3) | 2.7 ± 0.1 (3) |
| Slc27a4  | 1.0 ± 0.0 (6) | 1.0 ± 0.1 (3) | 1.2 ± 0.1 (3) | 1.0 ± 0.1 (3) | 1.0 ± 0.1 (3) | 0.9 ± 0.0 (3) | 1.0 ± 0.1 (3) | 1.0 ± 0.0 (3) | 0.9 ± 0.0 (3) |
| Slc27a5  | 1.0 ± 0.1 (6) | 1.2 ± 0.2 (3) | 1.1 ± 0.2 (3) | 1.2 ± 0.2 (3) | 1.1 ± 0.3 (3) | 0.9 ± 0.0 (3) | 1.0 ± 0.1 (3) | 1.1 ± 0.1 (3) | 1.1 ± 0.3 (3) |
| Slc27a6  | 1.0 ± 0.0 (6) | 1.4 ± 0.1 (3) | 1.1 ± 0.2 (3) | 1.1 ± 0.2 (3) | 1.4 ± 0.4 (3) | 1.0 ± 0.1 (3) | 1.3 ± 0.2 (3) | 1.7 ± 0.3 (3) | 1.5 ± 0.4 (3) |
| Smardc3  | 1.0 ± 0.1 (6) | 1.2 ± 0.1 (3) | 1.2 ± 0.1 (3) | 1.2 ± 0.2 (3) | 1.0 ± 0.1 (3) | 1.0 ± 0.1 (3) | 0.9 ± 0.1 (3) | 1.1 ± 0.1 (3) | 1.0 ± 0.2 (3) |
| Sorbs1   | 1.0 ± 0.1 (6) | 1.2 ± 0.2 (3) | 1.5 ± 0.1 (3) | 1.3 ± 0.1 (3) | 1.2 ± 0.1 (3) | 0.9 ± 0.1 (3) | 1.1 ± 0.1 (3) | 1.0 ± 0.0 (3) | 1.3 ± 0.2 (3) |
| Src      | 1.0 ± 0.0 (6) | 1.1 ± 0.3 (3) | 1.5 ± 0.1 (3) | 0.9 ± 0.1 (3) | 0.9 ± 0.2 (3) | 1.0 ± 0.0 (3) | 0.9 ± 0.1 (3) | 0.9 ± 0.0 (3) | 0.7 ± 0.1 (3) |
| Tgs1     | 1.0 ± 0.0 (6) | 0.9 ± 0.1 (3) | 1.0 ± 0.1 (3) | 0.9 ± 0.0 (3) | 1.0 ± 0.0 (3) | 0.8 ± 0.1 (3) | 1.0 ± 0.1 (3) | 0.9 ± 0.1 (3) | 0.9 ± 0.0 (3) |
| Txnip    | 1.0 ± 0.0 (6) | 0.9 ± 0.1 (3) | 1.1 ± 0.1 (3) | 1.1 ± 0.0 (3) | 1.2 ± 0.0 (3) | 1.1 ± 0.1 (3) | 1.2 ± 0.2 (3) | 1.1 ± 0.1 (3) | 1.1 ± 0.2 (3) |
| Ucp1     | n/a           |
| Actb     | 1.0 ± 0.0 (6) | 1.1 ± 0.1 (3) | 1.1 ± 0.0 (3) | 1.0 ± 0.1 (3) | 1.0 ± 0.0 (3) | 1.0 ± 0.0 (3) | 1.0 ± 0.0 (3) | 1.0 ± 0.0 (3) | 0.9 ± 0.0 (3) |
| B2m      | 1.0 ± 0.0 (6) | 0.9 ± 0.1 (3) | 0.9 ± 0.0 (3) | 1.0 ± 0.1 (3) | 1.0 ± 0.0 (3) | 1.0 ± 0.0 (3) | 1.0 ± 0.0 (3) | 1.0 ± 0.0 (3) | 1.1 ± 0.0 (3) |
| Hprt1    | 1.0 ± 0.0 (6) | 0.9 ± 0.0 (3) | 1.0 ± 0.1 (3) | 1.0 ± 0.0 (3) | 0.8 ± 0.0 (3) | 0.9 ± 0.1 (3) | 0.9 ± 0.1 (3) | 0.9 ± 0.0 (3) | 1.0 ± 0.0 (3) |
| Ldha     | 1.0 ± 0.0 (6) | 1.3 ± 0.0 (3) | 1.4 ± 0.1 (3) | 1.3 ± 0.1 (3) | 1.3 ± 0.1 (3) | 1.4 ± 0.1 (3) | 1.4 ± 0.0 (3) | 1.4 ± 0.1 (3) | 1.6 ± 0.1 (3) |

|       |               |               |               |               |               |               |               |               |               |
|-------|---------------|---------------|---------------|---------------|---------------|---------------|---------------|---------------|---------------|
| Rplp1 | 1.0 ± 0.0 (6) | 1.1 ± 0.1 (3) | 1.1 ± 0.0 (3) | 1.2 ± 0.0 (3) | 1.2 ± 0.1 (3) | 0.9 ± 0.0 (3) | 0.9 ± 0.0 (3) | 0.9 ± 0.0 (3) | 1.1 ± 0.1 (3) |
| RGDC  | n/a           |
| RTC1  | 1.0 ± 0.0 (6) | 1.3 ± 0.2 (3) | 1.0 ± 0.0 (3) | 1.1 ± 0.1 (3) | 1.6 ± 0.4 (3) | 0.8 ± 0.0 (3) | 0.8 ± 0.0 (3) | 0.8 ± 0.1 (3) | 1.2 ± 0.2 (3) |
| RTC2  | 1.0 ± 0.0 (6) | 1.3 ± 0.3 (3) | 1.1 ± 0.0 (3) | 1.1 ± 0.1 (3) | 1.6 ± 0.5 (3) | 0.8 ± 0.0 (3) | 0.8 ± 0.0 (3) | 0.8 ± 0.1 (3) | 1.1 ± 0.2 (3) |
| RTC3  | 1.0 ± 0.0 (6) | 1.4 ± 0.2 (3) | 1.0 ± 0.0 (3) | 1.1 ± 0.1 (3) | 1.6 ± 0.5 (3) | 0.8 ± 0.0 (3) | 0.8 ± 0.0 (3) | 0.8 ± 0.1 (3) | 1.1 ± 0.1 (3) |
| PPC1  | 1.0 ± 0.0 (6) | 1.4 ± 0.2 (3) | 1.2 ± 0.0 (3) | 1.2 ± 0.1 (3) | 1.7 ± 0.6 (3) | 0.9 ± 0.1 (3) | 0.9 ± 0.0 (3) | 0.8 ± 0.0 (3) | 1.2 ± 0.2 (3) |
| PPC2  | 1.0 ± 0.0 (6) | 1.5 ± 0.3 (3) | 1.2 ± 0.0 (3) | 1.2 ± 0.0 (3) | 1.8 ± 0.6 (3) | 0.8 ± 0.0 (3) | 0.8 ± 0.0 (3) | 0.8 ± 0.0 (3) | 1.1 ± 0.2 (3) |
| PPC3  | 1.0 ± 0.0 (6) | 1.5 ± 0.4 (3) | 1.2 ± 0.0 (3) | 1.2 ± 0.0 (3) | 1.7 ± 0.6 (3) | 0.8 ± 0.0 (3) | 0.9 ± 0.0 (3) | 0.8 ± 0.1 (3) | 1.2 ± 0.1 (3) |

Data represent fold induction versus control (mean ± standard error (n)).

Genes reported as “n/a” were not sufficiently expressed ( $C_T \geq 36$ ) to analyze

GD=gestation day; PPAR=peroxisome proliferator activated receptor; HFPO-DA=hexafluoropropylene oxide-dimer acid

**Table S4. Fetal testis (collected GD18) gene expression of genes associated with phthalate-like male reproductive effects following GD14-18 maternal oral exposure to HFPO-DA.**

| Gene    | HFPO-DA dose (mg/kg/d) |               |                 |               |                 |
|---------|------------------------|---------------|-----------------|---------------|-----------------|
|         | 0                      | 62.5          | 125             | 250           | 500             |
| Acox1   | 1.0 ± 0.1 (2)          | 1.3 ± 0.0 (3) | 1.1 ± 0.1 (3)   | 1.1 ± 0.1 (3) | 1.2 ± 0.0 (2)   |
| Actb    | 1.0 ± 0.0 (2)          | 1.3 ± 0.1 (3) | 1.1 ± 0.1 (3)   | 1.1 ± 0.0 (3) | 1.1 ± 0.1 (2)   |
| Acvr2b  | 1.0 ± 0.2 (2)          | 1.4 ± 0.1 (3) | 1.2 ± 0.2 (3)   | 1.1 ± 0.1 (3) | 1.3 ± 0.3 (2)   |
| Adh1    | 1.0 ± 0.3 (2)          | 1.3 ± 0.5 (3) | 1.7 ± 0.2 (3)   | 1.2 ± 0.3 (3) | 1.7 ± 0.6 (2)   |
| Aldh1a1 | 1.0 ± 0.1 (2)          | 1.1 ± 0.0 (3) | 1.1 ± 0.1 (3)   | 1.1 ± 0.1 (3) | 1.1 ± 0.1 (2)   |
| Amhr2   | 1.0 ± 0.0 (2)          | 1.0 ± 0.0 (3) | 0.9 ± 0.0 (3)   | 0.9 ± 0.1 (3) | 1.0 ± 0.0 (2)   |
| Apoa1   | 1.0 ± 0.4 (2)          | 0.6 ± 0.1 (3) | 1.7 ± 1.0 (3)   | 0.7 ± 0.1 (3) | 1.8 ± 1.3 (2)   |
| Ar      | 1.0 ± 0.0 (2)          | 1.2 ± 0.0 (3) | 1.2 ± 0.2 (3)   | 1.4 ± 0.2 (3) | 1.5 ± 0.2 (2)   |
| Axin1   | 1.0 ± 0.1 (2)          | 1.1 ± 0.1 (3) | 1.0 ± 0.1 (3)   | 1.1 ± 0.1 (3) | 1.1 ± 0.0 (2)   |
| Axin2   | 1.0 ± 0.2 (2)          | 1.3 ± 0.1 (3) | 1.0 ± 0.1 (3)   | 1.1 ± 0.1 (3) | 1.2 ± 0.1 (2)   |
| B2m     | 1.0 ± 0.1 (2)          | 1.3 ± 0.0 (3) | 1.4 ± 0.1 (3)   | 1.2 ± 0.1 (3) | 1.3 ± 0.2 (2)   |
| Cbx2    | 1.0 ± 0.1 (2)          | 1.1 ± 0.1 (3) | 1.1 ± 0.1 (3)   | 1.4 ± 0.2 (3) | 1.4 ± 0.1 (2)   |
| Cyp11a1 | 1.0 ± 0.0 (2)          | 1.3 ± 0.0 (3) | 1.3 ± 0.2 (3)   | 1.3 ± 0.1 (3) | 1.1 ± 0.1 (2)   |
| Cyp11b1 | 1.0 ± 0.2 (2)          | 1.3 ± 0.1 (3) | 1.0 ± 0.1 (3)   | 1.7 ± 0.3 (3) | 1.1 ± 0.1 (2)   |
| Cyp11b2 | 1.0 ± 0.2 (2)          | 1.7 ± 0.2 (3) | 1.7 ± 0.2 (3)   | 2.2 ± 0.3 (3) | 1.4 ± 0.1 (2)   |
| Cyp17a1 | 1.0 ± 0.0 (2)          | 1.1 ± 0.1 (3) | 1.2 ± 0.2 (3)   | 1.0 ± 0.1 (3) | 1.2 ± 0.0 (2)   |
| Cyp4a1  | n/a                    | n/a           | n/a             | n/a           | n/a             |
| Dhcr7   | 1.0 ± 0.1 (2)          | 1.2 ± 0.1 (3) | 1.2 ± 0.1 (3)   | 1.3 ± 0.2 (3) | 1.4 ± 0.1 (2)   |
| Dhh     | 1.0 ± 0.2 (2)          | 1.2 ± 0.1 (3) | 1.2 ± 0.1 (3)   | 1.7 ± 0.4 (3) | 1.5 ± 0.1 (2)   |
| Dixdc1  | 1.0 ± 0.2 (2)          | 1.2 ± 0.1 (3) | 0.9 ± 0.1 (3)   | 1.0 ± 0.1 (3) | 1.1 ± 0.1 (2)   |
| Dkk1    | 1.0 ± 0.2 (2)          | 1.9 ± 1.0 (3) | 1.7 ± 0.2 (3)   | 2.0 ± 0.5 (3) | 0.8 ± 0.1 (2)   |
| Dkk3    | 1.0 ± 0.1 (2)          | 1.0 ± 0.1 (3) | 1.0 ± 0.1 (3)   | 0.9 ± 0.1 (3) | 0.9 ± 0.1 (2)   |
| Dmrt1   | 1.0 ± 0.2 (2)          | 1.1 ± 0.0 (3) | 1.1 ± 0.1 (3)   | 1.1 ± 0.2 (3) | 1.0 ± 0.0 (2)   |
| Dmrt2   | 1.0 ± 0.5 (2)          | 1.0 ± 0.3 (3) | 1.1 ± 0.3 (3)   | 1.3 ± 0.5 (3) | 0.8 ± 0.1 (2)   |
| Dvl1    | 1.0 ± 0.0 (2)          | 1.0 ± 0.1 (3) | 1.0 ± 0.0 (3)   | 1.2 ± 0.2 (3) | 1.2 ± 0.1 (2)   |
| Dvl2    | 1.0 ± 0.0 (2)          | 1.3 ± 0.1 (3) | 1.0 ± 0.2 (3)   | 1.0 ± 0.1 (3) | 1.0 ± 0.4 (2)   |
| Dvl3    | 1.0 ± 0.0 (2)          | 1.6 ± 0.0 (3) | 1.3 ± 0.2 (3)   | 1.3 ± 0.1 (3) | 1.4 ± 0.1 (2)   |
| Emx2    | 1.0 ± 0.0 (2)          | 1.2 ± 0.1 (3) | 1.0 ± 0.1 (3)   | 1.1 ± 0.1 (3) | 1.0 ± 0.1 (2)   |
| Esr1    | 1.0 ± 0.2 (2)          | 1.5 ± 0.1 (3) | 1.3 ± 0.1 (3)   | 1.2 ± 0.1 (3) | 1.7 ± 0.1 (2)   |
| Esr2    | 1.0 ± 0.1 (2)          | 0.8 ± 0.1 (3) | 0.7 ± 0.2 (3)   | 0.9 ± 0.1 (3) | 1.1 ± 0.0 (2)   |
| Fabp1   | 1.0 ± 0.2 (2)          | 0.9 ± 0.4 (3) | 14.8 ± 11.6 (3) | 4.2 ± 1.3 (3) | 12.8 ± 12.2 (2) |
| Fgf8    | 1.0 ± 0.1 (2)          | 1.3 ± 0.1 (3) | 1.1 ± 0.3 (3)   | 1.3 ± 0.2 (3) | 1.6 ± 0.4 (2)   |
| Fgf9    | 1.0 ± 0.1 (2)          | 1.2 ± 0.1 (3) | 0.9 ± 0.1 (3)   | 1.0 ± 0.1 (3) | 1.0 ± 0.0 (2)   |
| Gata4   | 1.0 ± 0.0 (2)          | 1.2 ± 0.0 (3) | 1.2 ± 0.1 (3)   | 1.4 ± 0.1 (3) | 1.4 ± 0.0 (2)   |
| Gusb    | 1.0 ± 0.0 (2)          | 1.0 ± 0.0 (3) | 0.9 ± 0.1 (3)   | 0.9 ± 0.1 (3) | 0.9 ± 0.0 (2)   |
| Hoxa2   | 1.0 ± 0.3 (2)          | 1.1 ± 0.3 (3) | 0.7 ± 0.1 (3)   | 0.8 ± 0.1 (3) | 0.5 ± 0.3 (2)   |
| Hsd17b3 | 1.0 ± 0.1 (2)          | 1.1 ± 0.0 (3) | 1.1 ± 0.1 (3)   | 1.1 ± 0.1 (3) | 1.3 ± 0.1 (2)   |
| Hsd3b   | 1.0 ± 0.1 (2)          | 1.1 ± 0.0 (3) | 1.0 ± 0.1 (3)   | 1.0 ± 0.1 (3) | 1.1 ± 0.2 (2)   |

|             |               |               |               |               |               |
|-------------|---------------|---------------|---------------|---------------|---------------|
| Inha        | 1.0 ± 0.1 (2) | 1.2 ± 0.1 (3) | 1.4 ± 0.2 (3) | 1.2 ± 0.2 (3) | 1.0 ± 0.0 (2) |
| Inhba       | 1.0 ± 0.2 (2) | 1.1 ± 0.1 (3) | 1.0 ± 0.1 (3) | 1.3 ± 0.1 (3) | 1.3 ± 0.1 (2) |
| Inhbb       | 1.0 ± 0.1 (2) | 1.1 ± 0.0 (3) | 1.0 ± 0.1 (3) | 1.2 ± 0.1 (3) | 1.1 ± 0.1 (2) |
| Insl3       | 1.0 ± 0.0 (2) | 1.3 ± 0.1 (3) | 1.2 ± 0.2 (3) | 1.3 ± 0.1 (3) | 1.3 ± 0.0 (2) |
| Ldha        | 1.0 ± 0.0 (2) | 0.8 ± 0.0 (3) | 1.0 ± 0.0 (3) | 0.9 ± 0.0 (3) | 1.0 ± 0.1 (2) |
| Lhcgr       | 1.0 ± 0.1 (2) | 1.5 ± 0.2 (3) | 1.3 ± 0.1 (3) | 1.4 ± 0.1 (3) | 1.2 ± 0.0 (2) |
| Lhx1        | 1.0 ± 0.1 (2) | 1.4 ± 0.1 (3) | 1.5 ± 0.3 (3) | 1.6 ± 0.2 (3) | 1.2 ± 0.0 (2) |
| Lhx9        | 1.0 ± 0.2 (2) | 1.4 ± 0.2 (3) | 1.1 ± 0.1 (3) | 1.3 ± 0.1 (3) | 1.2 ± 0.3 (2) |
| LOC691504   | 1.0 ± 0.1 (2) | 1.4 ± 0.2 (3) | 1.5 ± 0.2 (3) | 1.7 ± 0.5 (3) | 1.1 ± 0.0 (2) |
| Mapk3       | 1.0 ± 0.0 (2) | 1.0 ± 0.1 (3) | 1.0 ± 0.1 (3) | 1.0 ± 0.1 (3) | 1.0 ± 0.1 (2) |
| Nr0b1       | 1.0 ± 0.2 (2) | 1.1 ± 0.1 (3) | 1.0 ± 0.1 (3) | 0.9 ± 0.1 (3) | 1.1 ± 0.2 (2) |
| Nr1d1       | 1.0 ± 0.1 (2) | 1.2 ± 0.1 (3) | 1.2 ± 0.0 (3) | 1.2 ± 0.2 (3) | 1.3 ± 0.0 (2) |
| Nr3c1       | 1.0 ± 0.0 (2) | 1.1 ± 0.1 (3) | 0.9 ± 0.1 (3) | 1.1 ± 0.2 (3) | 1.0 ± 0.0 (2) |
| Nr3c2       | 1.0 ± 0.3 (2) | 1.1 ± 0.2 (3) | 0.7 ± 0.2 (3) | 0.9 ± 0.1 (3) | 1.1 ± 0.0 (2) |
| Nr4a2       | 1.0 ± 0.2 (2) | 1.2 ± 0.1 (3) | 1.1 ± 0.2 (3) | 1.0 ± 0.0 (3) | 1.2 ± 0.2 (2) |
| Nr5a1       | 1.0 ± 0.2 (2) | 1.1 ± 0.0 (3) | 1.0 ± 0.1 (3) | 1.2 ± 0.1 (3) | 1.2 ± 0.1 (2) |
| Ntf3        | 1.0 ± 0.2 (2) | 1.2 ± 0.1 (3) | 1.1 ± 0.1 (3) | 1.1 ± 0.1 (3) | 1.0 ± 0.0 (2) |
| Ntrk3       | 1.0 ± 0.1 (2) | 1.6 ± 0.4 (3) | 1.3 ± 0.1 (3) | 1.3 ± 0.3 (3) | 1.2 ± 0.3 (2) |
| Pcaf        | 1.0 ± 0.1 (2) | 1.3 ± 0.1 (3) | 1.3 ± 0.2 (3) | 1.0 ± 0.1 (3) | 1.1 ± 0.1 (2) |
| Pdgfa       | 1.0 ± 0.1 (2) | 1.0 ± 0.1 (3) | 0.9 ± 0.1 (3) | 1.2 ± 0.1 (3) | 1.3 ± 0.0 (2) |
| Pdgfra      | 1.0 ± 0.3 (2) | 1.0 ± 0.1 (3) | 0.8 ± 0.1 (3) | 0.9 ± 0.1 (3) | 1.0 ± 0.0 (2) |
| Pou5f1      | 1.0 ± 0.3 (2) | 1.2 ± 0.1 (3) | 1.2 ± 0.1 (3) | 1.0 ± 0.1 (3) | 1.2 ± 0.2 (2) |
| Ppara       | 1.0 ± 0.2 (2) | 1.0 ± 0.1 (3) | 1.0 ± 0.0 (3) | 0.9 ± 0.1 (3) | 1.1 ± 0.0 (2) |
| Ppard       | 1.0 ± 0.1 (2) | 1.1 ± 0.1 (3) | 1.1 ± 0.1 (3) | 1.2 ± 0.2 (3) | 1.2 ± 0.1 (2) |
| Pparg       | n/a           | n/a           | n/a           | n/a           | n/a           |
| PPC         | 1.0 ± 0.1 (2) | 1.0 ± 0.2 (3) | 1.6 ± 0.4 (3) | 1.0 ± 0.1 (3) | 1.1 ± 0.0 (2) |
| Ptch1       | 1.0 ± 0.1 (2) | 1.3 ± 0.1 (3) | 1.0 ± 0.0 (3) | 1.2 ± 0.2 (3) | 1.4 ± 0.0 (2) |
| Ptgds2      | 1.0 ± 0.2 (2) | 1.2 ± 0.1 (3) | 1.4 ± 0.1 (3) | 1.0 ± 0.1 (3) | 1.1 ± 0.2 (2) |
| Rara        | 1.0 ± 0.0 (2) | 1.3 ± 0.3 (3) | 1.1 ± 0.2 (3) | 1.1 ± 0.1 (3) | 1.4 ± 0.1 (2) |
| Rarb        | 1.0 ± 0.0 (2) | 1.3 ± 0.2 (3) | 1.1 ± 0.0 (3) | 1.1 ± 0.1 (3) | 1.2 ± 0.0 (2) |
| Rarg_mapped | 1.0 ± 0.0 (2) | 1.1 ± 0.1 (3) | 1.0 ± 0.1 (3) | 1.2 ± 0.1 (3) | 1.1 ± 0.1 (2) |
| RGD1563046  | 1.0 ± 0.3 (2) | 1.0 ± 0.1 (3) | 1.1 ± 0.1 (3) | 0.9 ± 0.2 (3) | 1.1 ± 0.1 (2) |
| RGDC        | n/a           | n/a           | n/a           | n/a           | n/a           |
| Rhox10      | 1.0 ± 0.2 (2) | 0.9 ± 0.1 (3) | 0.9 ± 0.2 (3) | 1.0 ± 0.1 (3) | 1.0 ± 0.1 (2) |
| Rhox5       | 1.0 ± 0.1 (2) | 1.2 ± 0.1 (3) | 1.0 ± 0.0 (3) | 1.2 ± 0.2 (3) | 1.3 ± 0.2 (2) |
| RTC         | 1.0 ± 0.0 (2) | 0.8 ± 0.1 (3) | 1.3 ± 0.3 (3) | 1.0 ± 0.1 (3) | 1.1 ± 0.1 (2) |
| Rxra        | 1.0 ± 0.0 (2) | 1.1 ± 0.1 (3) | 1.0 ± 0.1 (3) | 1.2 ± 0.1 (3) | 1.2 ± 0.2 (2) |
| Rxrb        | 1.0 ± 0.2 (2) | 1.1 ± 0.1 (3) | 1.1 ± 0.1 (3) | 1.1 ± 0.1 (3) | 1.2 ± 0.2 (2) |
| Rxrg        | 1.0 ± 0.1 (2) | 1.2 ± 0.4 (3) | 1.1 ± 0.3 (3) | 1.3 ± 0.3 (3) | 1.5 ± 0.2 (2) |
| Scarb1      | 1.0 ± 0.1 (2) | 1.2 ± 0.1 (3) | 1.2 ± 0.2 (3) | 1.3 ± 0.2 (3) | 1.4 ± 0.2 (2) |
| Sfrp1       | 1.0 ± 0.2 (2) | 1.0 ± 0.1 (3) | 1.0 ± 0.1 (3) | 1.0 ± 0.2 (3) | 1.1 ± 0.2 (2) |
| Sfrp2       | 1.0 ± 0.1 (2) | 1.0 ± 0.2 (3) | 0.7 ± 0.0 (3) | 1.1 ± 0.1 (3) | 0.9 ± 0.1 (2) |
| Sfrp4       | 1.0 ± 0.4 (2) | 1.4 ± 0.3 (3) | 2.4 ± 0.7 (3) | 1.6 ± 0.5 (3) | 1.6 ± 0.4 (2) |



|       |               |               |               |               |               |
|-------|---------------|---------------|---------------|---------------|---------------|
| Sfrp5 | 1.0 ± 0.0 (2) | 3.3 ± 0.9 (3) | 1.7 ± 0.5 (3) | 1.5 ± 0.3 (3) | 2.2 ± 0.5 (2) |
| Smo   | 1.0 ± 0.2 (2) | 0.9 ± 0.0 (3) | 0.9 ± 0.1 (3) | 1.2 ± 0.1 (3) | 1.0 ± 0.0 (2) |
| Sox8  | 1.0 ± 0.2 (2) | 1.5 ± 0.1 (3) | 1.4 ± 0.0 (3) | 1.6 ± 0.1 (3) | 1.6 ± 0.2 (2) |
| Sox9  | 1.0 ± 0.2 (2) | 1.3 ± 0.1 (3) | 1.1 ± 0.1 (3) | 1.4 ± 0.3 (3) | 1.5 ± 0.1 (2) |
| Sra1  | 1.0 ± 0.0 (2) | 1.2 ± 0.1 (3) | 1.2 ± 0.1 (3) | 1.0 ± 0.1 (3) | 1.0 ± 0.1 (2) |
| Sry   | 1.0 ± 0.3 (2) | 1.4 ± 0.3 (3) | 1.1 ± 0.2 (3) | 1.2 ± 0.1 (3) | 1.7 ± 0.1 (2) |
| Star  | 1.0 ± 0.2 (2) | 1.1 ± 0.1 (3) | 1.0 ± 0.1 (3) | 1.0 ± 0.1 (3) | 1.0 ± 0.0 (2) |
| Tgfb1 | 1.0 ± 0.0 (2) | 1.2 ± 0.1 (3) | 1.2 ± 0.1 (3) | 1.3 ± 0.1 (3) | 1.1 ± 0.0 (2) |
| Tle1  | 1.0 ± 0.1 (2) | 1.1 ± 0.1 (3) | 1.0 ± 0.0 (3) | 1.0 ± 0.1 (3) | 1.1 ± 0.1 (2) |
| Tle2  | 1.0 ± 0.1 (2) | 1.0 ± 0.0 (3) | 1.1 ± 0.1 (3) | 0.9 ± 0.0 (3) | 1.0 ± 0.1 (2) |
| Tspo  | 1.0 ± 0.1 (2) | 1.0 ± 0.0 (3) | 1.1 ± 0.0 (3) | 1.1 ± 0.1 (3) | 1.2 ± 0.0 (2) |
| Vdr   | 1.0 ± 0.3 (2) | 2.2 ± 0.0 (3) | 1.4 ± 0.1 (3) | 2.5 ± 0.3 (3) | 2.7 ± 0.3 (2) |
| Wnt7a | 1.0 ± 0.3 (2) | 1.0 ± 0.1 (3) | 1.1 ± 0.3 (3) | 1.4 ± 0.3 (3) | 2.0 ± 1.0 (2) |
| Wt1   | 1.0 ± 0.0 (2) | 1.1 ± 0.1 (3) | 1.0 ± 0.1 (3) | 1.2 ± 0.2 (3) | 1.2 ± 0.0 (2) |
| Zfp2  | 1.0 ± 0.2 (2) | 1.3 ± 0.2 (3) | 1.1 ± 0.1 (3) | 1.1 ± 0.1 (3) | 1.3 ± 0.2 (2) |

Data represent fold induction versus control testis expression (mean ± standard error (n)).

Genes labelled “n/a” were not sufficiently expressed ( $C_T \geq 36$ ) to analyze.

GD=gestation day; HFPO-DA=hexafluoropropylene oxide-dimer acid

**Table S5. Maternal and fetal endpoints from GD14-18 oral maternal HFPO-DA exposure.**

|                        | HFPO-DA dose (mg/kg/d) |                      |                     |                     |                                  |                                  |                                  |                                 |                                   |
|------------------------|------------------------|----------------------|---------------------|---------------------|----------------------------------|----------------------------------|----------------------------------|---------------------------------|-----------------------------------|
|                        | 0                      | 1                    | 3                   | 10                  | 30                               | 62.5                             | 125                              | 250                             | 500                               |
| Dam BW GD14 (g)        | 336.0 ± 11.4<br>(9)    | 337.0 ± 12.9<br>(6)  | 341.6 ± 14.1<br>(6) | 330.8 ± 13.4<br>(6) | 338.0 ± 11.5<br>(6)              | 320.9 ± 8.7<br>(3)               | 330.6 ± 8.8<br>(3)               | 325.8 ± 3.7<br>(3)              | 339.1 ± 10.5<br>(3)               |
| Dam BW GD18 (g)        | 369.6 ± 13.2<br>(9)    | 369.8 ± 15.1<br>(6)  | 378.6 ± 19.1<br>(6) | 364.1 ± 15.6<br>(6) | 371.5 ± 11.4<br>(6)              | 354.3 ± 12.4<br>(3)              | 366.2 ± 9.9<br>(3)               | 346.7 ± 5.5<br>(3)              | 350.2 ± 6.0<br>(3)                |
| No. fetuses            | 13.1 ± 0.5<br>(9)      | 12.3 ± 1.0<br>(6)    | 13.3 ± 0.6<br>(6)   | 13.2 ± 0.5<br>(6)   | 13.5 ± 0.4<br>(6)                | 12.7 ± 0.9<br>(3)                | 14.3 ± 0.3<br>(3)                | 13.7 ± 1.3<br>(3)               | 14.7 ± 0.3<br>(3)                 |
| No. resorptions        | 0.1 ± 0.1<br>(9)       | 0.0 ± 0.0<br>(6)     | 0.0 ± 0.0<br>(6)    | 0.0 ± 0.0<br>(6)    | 0.2 ± 0.2<br>(6)                 | 0.0 ± 0.0<br>(3)                 | 0.0 ± 0.0<br>(3)                 | 0.0 ± 0.0<br>(3)                | 0.0 ± 0.0<br>(3)                  |
| Dam liver wt (g)       | 16.7 ± 1.0<br>(9)      | 15.8 ± 0.7<br>(6)    | 16.7 ± 1.1<br>(6)   | 16.5 ± 0.5<br>(6)   | 17.2 ± 0.5<br>(6)                | <b>17.8 ± 0.7</b><br><b>(3)</b>  | <b>19.1 ± 0.6</b><br><b>(3)</b>  | <b>19.6 ± 0.3</b><br><b>(3)</b> | <b>19.2 ± 0.6</b><br><b>(3)</b>   |
| Fetal BW (mg)          | 875.4 ± 24.0<br>(6)    | 908.7 ± 27.0<br>(3)  | 816.7 ± 24.2<br>(3) | 841.0 ± 38.4<br>(3) | 842.2 ± 50.5<br>(3)              | 863.7 ± 31.7<br>(3)              | 841.8 ± 46.7<br>(3)              | 889.1 ± 26.9<br>(3)             | 808.2 ± 88.9<br>(3)               |
| Dam BW gain (g)        | 33.7 ± 3.0<br>(9)      | 32.8 ± 4.4<br>(6)    | 37.0 ± 5.6<br>(6)   | 33.3 ± 2.8<br>(6)   | 33.6 ± 1.6<br>(6)                | 33.4 ± 4.3<br>(3)                | 35.5 ± 1.5<br>(3)                | <b>20.9 ± 3.5</b><br><b>(3)</b> | <b>11.1 ± 4.4</b><br><b>(3)</b>   |
| Dam serum T4 (ng/mL)   | 22.8 ± 1.9<br>(6)      | 27.9 ± 2.4<br>(3)    | 23.0 ± 4.5<br>(3)   | 17.5 ± 1.1<br>(3)   | 28.4 ± 7.2<br>(3)                | 20.3 ± 2.4<br>(3)                | <b>11.6 ± 0.7</b><br><b>(3)</b>  | <b>8.4 ± 1.8</b><br><b>(3)</b>  | <b>5.5 ± 0.9</b><br><b>(3)</b>    |
| Dam serum T3 (ng/mL)   | 0.62 ± 0.04<br>(6)     | 0.67 ± 0.07<br>(3)   | 0.61 ± 0.03<br>(3)  | 0.52 ± 0.07<br>(3)  | <b>0.45 ± 0.06</b><br><b>(3)</b> | <b>0.38 ± 0.06</b><br><b>(3)</b> | <b>0.32 ± 0.03</b><br><b>(3)</b> | <DL<br><b>(3)</b>               | <DL<br><b>(3)</b>                 |
| Dam serum Trig (mg/dL) | 297.0 ± 40.9<br>(6)    | 265.7 ± 118.6<br>(3) | 322.0 ± 17.9<br>(3) | 262.0 ± 41.5<br>(3) | 195.0 ± 15.3<br>(3)              | 211.0 ± 20.8<br>(3)              | 221.0 ± 48.2<br>(3)              | 171.0 ± 4.6<br>(3)              | <b>160.0 ± 59.4</b><br><b>(3)</b> |
| Dam serum HDL (mg/dL)  | 37.3 ± 1.7<br>(6)      | 36.3 ± 3.7<br>(3)    | 36.0 ± 2.5<br>(3)   | 36.0 ± 2.5<br>(3)   | 33.0 ± 3.6<br>(3)                | 37.0 ± 1.2<br>(3)                | 36.7 ± 4.7<br>(3)                | <b>28.7 ± 3.2</b><br><b>(3)</b> | <b>19.3 ± 2.7</b><br><b>(3)</b>   |
| Dam serum Chol (mg/dL) | 79.3 ± 4.1<br>(6)      | 86.3 ± 13.9<br>(3)   | 74.3 ± 5.0<br>(3)   | 69.7 ± 3.7<br>(3)   | 68.0 ± 9.1<br>(3)                | 72.0 ± 4.9<br>(3)                | 69.3 ± 8.4<br>(3)                | <b>54.3 ± 9.1</b><br><b>(3)</b> | <b>42.3 ± 8.8</b><br><b>(3)</b>   |
| Dam serum LDL (mg/dL)  | 17.8 ± 0.9<br>(6)      | 19.0 ± 3.2<br>(3)    | 14.7 ± 0.3<br>(3)   | 14.0 ± 0.6<br>(3)   | 14.7 ± 0.9<br>(3)                | 14.0 ± 1.2<br>(3)                | <b>12.7 ± 0.9</b><br><b>(3)</b>  | <b>12.3 ± 1.9</b><br><b>(3)</b> | <b>13.3 ± 1.9</b><br><b>(3)</b>   |
| Fetal T prod (ng/mL)   | 7.7 ± 0.8<br>(6)       | 7.2 ± 0.5<br>(3)     | 6.5 ± 0.6<br>(3)    | 6.8 ± 0.7<br>(3)    | 7.2 ± 0.7<br>(3)                 | 10.4 ± 1.3<br>(3)                | 9.1 ± 1.0<br>(3)                 | 9.5 ± 0.3<br>(3)                | 9.8 ± 0.4<br>(3)                  |
| Fetal T prod (% Ctl)   | 100.0 ± 7.8<br>(6)     | 113.0 ± 7.5<br>(3)   | 101.1 ± 9.1<br>(3)  | 105.9 ± 10.2<br>(3) | 111.7 ± 10.6<br>(3)              | 116.0 ± 14.2<br>(3)              | 101.3 ± 11.7<br>(3)              | 105.8 ± 3.3<br>(3)              | 109.6 ± 4.7<br>(3)                |

Data represent mean ± standard error (n). Values significantly different (p<0.05) from control, based on AVOVA, are shaded with bold text.

BW: body weight; GD: gestation day; Trig: triglycerides; Chol: cholesterol; T prod: testosterone production; <DL: Below assay detection limit; T4: total thyroxine; T3: total triiodothyronine; HDL: high density lipoprotein; LDL: low density lipoprotein; HFPO-DA: hexafluoropropylene oxide-dimer acid

**Table S6. Maternal liver (collected GD18) PPAR gene expression following GD14-18 maternal oral exposure to HFPO-DA.**

| Gene    | HFPO-DA dose (mg/kg/d) |               |               |               |               |               |                |                |                |
|---------|------------------------|---------------|---------------|---------------|---------------|---------------|----------------|----------------|----------------|
|         | 0                      | 1             | 3             | 10            | 30            | 62.5          | 125            | 250            | 500            |
| Acaa2   | 1.0 ± 0.1 (5)          | 1.5 ± 0.4 (3) | 1.2 ± 0.1 (3) | 1.5 ± 0.3 (3) | 1.9 ± 0.5 (2) | 3.5 ± 0.2 (3) | 4.2 ± 0.6 (3)  | 5.0 ± 0.3 (3)  | 5.4 ± 0.7 (3)  |
| Acadl   | 1.0 ± 0.0 (5)          | 0.9 ± 0.2 (3) | 1.2 ± 0.1 (3) | 1.0 ± 0.1 (3) | 1.5 ± 0.1 (2) | 2.3 ± 0.0 (3) | 2.3 ± 0.1 (3)  | 2.7 ± 0.1 (3)  | 2.7 ± 0.2 (3)  |
| Acadm   | 1.0 ± 0.1 (5)          | 1.2 ± 0.2 (3) | 1.2 ± 0.0 (3) | 1.1 ± 0.1 (3) | 1.8 ± 0.1 (2) | 1.7 ± 0.2 (3) | 2.2 ± 0.1 (3)  | 2.7 ± 0.2 (3)  | 2.6 ± 0.2 (3)  |
| Acox1   | 1.0 ± 0.0 (5)          | 1.2 ± 0.2 (3) | 1.4 ± 0.1 (3) | 1.3 ± 0.2 (3) | 3.0 ± 0.1 (2) | 5.1 ± 0.5 (3) | 8.3 ± 0.6 (3)  | 10.5 ± 0.8 (3) | 10.5 ± 1.2 (3) |
| Acox3   | 1.0 ± 0.0 (5)          | 1.3 ± 0.1 (3) | 1.3 ± 0.0 (3) | 0.9 ± 0.2 (3) | 1.2 ± 0.1 (2) | 1.1 ± 0.1 (3) | 1.2 ± 0.1 (3)  | 1.0 ± 0.1 (3)  | 0.9 ± 0.0 (3)  |
| Acs11   | 1.0 ± 0.1 (5)          | 1.3 ± 0.1 (3) | 1.5 ± 0.0 (3) | 1.1 ± 0.3 (3) | 1.7 ± 0.1 (2) | 1.6 ± 0.1 (3) | 1.8 ± 0.1 (3)  | 1.8 ± 0.0 (3)  | 1.7 ± 0.1 (3)  |
| Acs13   | 1.0 ± 0.1 (5)          | 0.9 ± 0.2 (3) | 1.1 ± 0.0 (3) | 0.9 ± 0.2 (3) | 1.0 ± 0.1 (2) | 1.7 ± 0.0 (3) | 2.0 ± 0.1 (3)  | 2.4 ± 0.4 (3)  | 2.7 ± 0.3 (3)  |
| Acs14   | 1.0 ± 0.0 (5)          | 1.0 ± 0.1 (3) | 1.0 ± 0.1 (3) | 0.7 ± 0.1 (3) | 0.9 ± 0.1 (2) | 1.3 ± 0.0 (3) | 1.2 ± 0.0 (3)  | 1.2 ± 0.1 (3)  | 1.0 ± 0.0 (3)  |
| Acs15   | 1.0 ± 0.1 (5)          | 0.9 ± 0.1 (3) | 1.0 ± 0.1 (3) | 0.7 ± 0.1 (3) | 0.9 ± 0.0 (2) | 1.1 ± 0.1 (3) | 1.0 ± 0.0 (3)  | 0.8 ± 0.1 (3)  | 0.5 ± 0.1 (3)  |
| Adipoq  | n/a                    | n/a           | n/a           | n/a           | n/a           | n/a           | n/a            | n/a            | n/a            |
| Angptl4 | 1.0 ± 0.2 (5)          | 2.3 ± 0.4 (3) | 3.4 ± 0.1 (3) | 2.1 ± 0.7 (3) | 3.6 ± 0.1 (2) | 3.0 ± 0.3 (3) | 3.0 ± 0.4 (3)  | 2.9 ± 0.1 (3)  | 2.5 ± 0.3 (3)  |
| Apoa1   | 1.0 ± 0.0 (5)          | 0.9 ± 0.2 (3) | 1.0 ± 0.1 (3) | 0.9 ± 0.2 (3) | 0.9 ± 0.1 (2) | 1.0 ± 0.1 (3) | 0.9 ± 0.1 (3)  | 1.0 ± 0.1 (3)  | 0.7 ± 0.0 (3)  |
| Apoa5   | 1.0 ± 0.1 (5)          | 1.1 ± 0.1 (3) | 1.2 ± 0.1 (3) | 0.5 ± 0.1 (3) | 0.8 ± 0.1 (2) | 0.7 ± 0.0 (3) | 0.6 ± 0.1 (3)  | 0.5 ± 0.0 (3)  | 0.3 ± 0.1 (3)  |
| Apoc3   | 1.0 ± 0.1 (5)          | 1.3 ± 0.1 (3) | 1.2 ± 0.1 (3) | 0.9 ± 0.0 (3) | 0.8 ± 0.0 (2) | 0.6 ± 0.0 (3) | 0.6 ± 0.1 (3)  | 0.4 ± 0.0 (3)  | 0.3 ± 0.0 (3)  |
| ApoE    | 1.0 ± 0.0 (5)          | 1.2 ± 0.1 (3) | 1.2 ± 0.1 (3) | 0.8 ± 0.2 (3) | 0.9 ± 0.0 (2) | 0.9 ± 0.0 (3) | 0.9 ± 0.0 (3)  | 0.8 ± 0.1 (3)  | 0.7 ± 0.0 (3)  |
| Aqp7    | 1.0 ± 0.1 (5)          | 1.6 ± 0.2 (3) | 1.9 ± 0.2 (3) | 1.5 ± 0.4 (3) | 2.1 ± 0.5 (2) | 1.5 ± 0.1 (3) | 1.4 ± 0.2 (3)  | 4.4 ± 0.3 (3)  | 3.1 ± 1.0 (3)  |
| Cd36    | 1.0 ± 0.1 (5)          | 0.8 ± 0.2 (3) | 1.2 ± 0.0 (3) | 0.8 ± 0.0 (3) | 0.9 ± 0.1 (2) | 1.0 ± 0.0 (3) | 1.2 ± 0.0 (3)  | 1.1 ± 0.1 (3)  | 1.0 ± 0.0 (3)  |
| Clu     | 1.0 ± 0.0 (5)          | 1.1 ± 0.1 (3) | 1.4 ± 0.2 (3) | 0.8 ± 0.1 (3) | 1.3 ± 0.0 (2) | 1.2 ± 0.1 (3) | 1.4 ± 0.1 (3)  | 1.5 ± 0.2 (3)  | 1.6 ± 0.1 (3)  |
| Cpt1a   | 1.0 ± 0.1 (5)          | 1.5 ± 0.6 (3) | 1.2 ± 0.2 (3) | 0.9 ± 0.2 (3) | 2.5 ± 0.2 (2) | 1.7 ± 0.2 (3) | 1.9 ± 0.0 (3)  | 2.4 ± 0.2 (3)  | 2.1 ± 0.3 (3)  |
| Cpt1b   | 1.0 ± 0.1 (5)          | 2.1 ± 0.5 (3) | 2.0 ± 0.3 (3) | 1.4 ± 0.5 (3) | 1.5 ± 0.4 (2) | 2.6 ± 0.2 (3) | 3.8 ± 0.9 (3)  | 19.0 ± 8.5 (3) | 23.7 ± 7.6 (3) |
| Cpt2    | 1.0 ± 0.0 (5)          | 1.1 ± 0.2 (3) | 1.7 ± 0.2 (3) | 1.6 ± 0.1 (3) | 2.3 ± 0.1 (2) | 2.8 ± 0.2 (3) | 3.2 ± 0.1 (3)  | 3.3 ± 0.0 (3)  | 3.1 ± 0.2 (3)  |
| Creb1   | 1.0 ± 0.0 (5)          | 1.1 ± 0.2 (3) | 1.1 ± 0.0 (3) | 0.9 ± 0.2 (3) | 0.9 ± 0.0 (2) | 1.0 ± 0.0 (3) | 0.9 ± 0.1 (3)  | 0.8 ± 0.0 (3)  | 0.9 ± 0.0 (3)  |
| Crebbp  | 1.0 ± 0.0 (5)          | 1.3 ± 0.2 (3) | 1.3 ± 0.1 (3) | 0.9 ± 0.2 (3) | 1.0 ± 0.0 (2) | 1.0 ± 0.0 (3) | 1.0 ± 0.1 (3)  | 0.9 ± 0.0 (3)  | 1.0 ± 0.0 (3)  |
| Cyp27a1 | 1.0 ± 0.1 (5)          | 1.4 ± 0.1 (3) | 1.9 ± 0.1 (3) | 0.9 ± 0.2 (3) | 1.3 ± 0.0 (2) | 1.2 ± 0.0 (3) | 1.1 ± 0.2 (3)  | 1.0 ± 0.0 (3)  | 1.0 ± 0.1 (3)  |
| Cyp7a1  | 1.0 ± 0.1 (5)          | 0.9 ± 0.3 (3) | 2.0 ± 0.5 (3) | 1.0 ± 0.3 (3) | 1.1 ± 0.4 (2) | 0.4 ± 0.1 (3) | 0.3 ± 0.0 (3)  | 0.2 ± 0.0 (3)  | 0.3 ± 0.0 (3)  |
| Dgat1   | 1.0 ± 0.0 (5)          | 1.1 ± 0.1 (3) | 1.3 ± 0.0 (3) | 1.1 ± 0.3 (3) | 1.2 ± 0.0 (2) | 1.5 ± 0.0 (3) | 1.6 ± 0.1 (3)  | 1.8 ± 0.1 (3)  | 1.9 ± 0.1 (3)  |
| Ech1    | 1.0 ± 0.0 (5)          | 2.2 ± 0.6 (3) | 2.0 ± 0.3 (3) | 3.8 ± 0.1 (3) | 7.3 ± 0.5 (2) | 8.8 ± 1.1 (3) | 12.3 ± 0.4 (3) | 15.4 ± 1.3 (3) | 18.1 ± 1.5 (3) |

|        |               |               |               |               |               |                |                |                |                |
|--------|---------------|---------------|---------------|---------------|---------------|----------------|----------------|----------------|----------------|
| Ehhadh | 1.0 ± 0.0 (5) | 1.5 ± 0.3 (3) | 2.9 ± 0.2 (3) | 3.0 ± 0.7 (3) | 7.9 ± 0.1 (2) | 18.0 ± 2.7 (3) | 37.0 ± 2.6 (3) | 53.5 ± 5.8 (3) | 55.0 ± 5.6 (3) |
| Eln    | 1.0 ± 0.1 (5) | 2.5 ± 0.4 (3) | 1.4 ± 0.3 (3) | 1.0 ± 0.5 (3) | 2.1 ± 1.3 (2) | 0.9 ± 0.1 (3)  | 1.6 ± 0.1 (3)  | 1.3 ± 0.6 (3)  | 0.9 ± 0.4 (3)  |
| Ep300  | 1.0 ± 0.1 (5) | 1.3 ± 0.2 (3) | 1.4 ± 0.0 (3) | 0.8 ± 0.2 (3) | 1.1 ± 0.2 (2) | 1.0 ± 0.0 (3)  | 0.8 ± 0.0 (3)  | 0.8 ± 0.1 (3)  | 0.8 ± 0.1 (3)  |
| Etfdh  | 1.0 ± 0.0 (5) | 1.2 ± 0.2 (3) | 1.2 ± 0.0 (3) | 1.6 ± 0.4 (3) | 1.6 ± 0.1 (2) | 1.4 ± 0.0 (3)  | 1.5 ± 0.0 (3)  | 1.6 ± 0.1 (3)  | 1.5 ± 0.1 (3)  |
| Fabp1  | 1.0 ± 0.0 (5) | 1.1 ± 0.2 (3) | 1.0 ± 0.0 (3) | 1.5 ± 0.2 (3) | 1.4 ± 0.0 (2) | 2.2 ± 0.1 (3)  | 2.5 ± 0.0 (3)  | 2.7 ± 0.0 (3)  | 2.3 ± 0.2 (3)  |
| Fabp2  | 1.0 ± 0.1 (5) | 0.7 ± 0.2 (3) | 0.9 ± 0.1 (3) | 1.0 ± 0.3 (3) | 0.9 ± 0.1 (2) | 1.5 ± 0.1 (3)  | 1.2 ± 0.2 (3)  | 1.6 ± 0.1 (3)  | 1.1 ± 0.1 (3)  |
| Fabp3  | 1.0 ± 0.0 (5) | 1.0 ± 0.1 (3) | 1.2 ± 0.2 (3) | 1.1 ± 0.0 (3) | 0.8 ± 0.0 (2) | 1.3 ± 0.1 (3)  | 1.1 ± 0.1 (3)  | 3.8 ± 2.1 (3)  | 5.6 ± 0.9 (3)  |
| Fabp4  | 1.0 ± 0.2 (5) | 2.3 ± 0.8 (3) | 0.7 ± 0.2 (3) | 1.3 ± 0.5 (3) | 1.6 ± 0.1 (2) | 0.8 ± 0.1 (3)  | 1.1 ± 0.2 (3)  | 1.8 ± 0.8 (3)  | 1.0 ± 0.1 (3)  |
| Fabp5  | 1.0 ± 0.1 (5) | 1.0 ± 0.2 (3) | 1.0 ± 0.1 (3) | 1.3 ± 0.3 (3) | 1.3 ± 0.2 (2) | 1.2 ± 0.1 (3)  | 1.0 ± 0.1 (3)  | 1.3 ± 0.1 (3)  | 0.8 ± 0.2 (3)  |
| Fabp6  | n/a           | n/a           | n/a           | n/a           | n/a           | n/a            | n/a            | n/a            | n/a            |
| Fabp7  | 1.0 ± 0.1 (5) | 2.0 ± 0.7 (3) | 1.1 ± 0.2 (3) | 1.9 ± 0.5 (3) | 1.8 ± 0.1 (2) | 1.3 ± 0.3 (3)  | 1.7 ± 0.1 (3)  | 2.0 ± 0.4 (3)  | 1.7 ± 0.3 (3)  |
| Fads2  | 1.0 ± 0.1 (5) | 1.0 ± 0.4 (3) | 1.4 ± 0.1 (3) | 0.9 ± 0.1 (3) | 1.8 ± 0.2 (2) | 2.7 ± 0.3 (3)  | 3.0 ± 0.2 (3)  | 2.6 ± 0.2 (3)  | 1.8 ± 0.2 (3)  |
| Fgr    | 1.0 ± 0.2 (5) | 1.2 ± 0.2 (3) | 1.0 ± 0.0 (3) | 0.6 ± 0.1 (3) | 0.8 ± 0.0 (2) | 0.8 ± 0.1 (3)  | 0.5 ± 0.1 (3)  | 0.6 ± 0.0 (3)  | 0.5 ± 0.0 (3)  |
| Gk     | 1.0 ± 0.1 (5) | 1.2 ± 0.2 (3) | 1.2 ± 0.0 (3) | 0.8 ± 0.2 (3) | 1.2 ± 0.1 (2) | 1.1 ± 0.2 (3)  | 1.2 ± 0.1 (3)  | 1.3 ± 0.1 (3)  | 1.4 ± 0.1 (3)  |
| Hif1a  | 1.0 ± 0.0 (5) | 1.2 ± 0.0 (3) | 1.2 ± 0.0 (3) | 1.0 ± 0.1 (3) | 1.0 ± 0.0 (2) | 1.0 ± 0.0 (3)  | 1.1 ± 0.1 (3)  | 1.1 ± 0.1 (3)  | 1.3 ± 0.1 (3)  |
| Hmgcs2 | 1.0 ± 0.0 (5) | 1.3 ± 0.2 (3) | 1.5 ± 0.1 (3) | 1.1 ± 0.3 (3) | 2.0 ± 0.2 (2) | 2.3 ± 0.0 (3)  | 2.7 ± 0.2 (3)  | 3.0 ± 0.2 (3)  | 3.1 ± 0.1 (3)  |
| Hspd1  | 1.0 ± 0.0 (5) | 1.1 ± 0.1 (3) | 1.2 ± 0.0 (3) | 1.3 ± 0.1 (3) | 1.1 ± 0.0 (2) | 1.9 ± 0.1 (3)  | 1.8 ± 0.1 (3)  | 2.2 ± 0.1 (3)  | 2.1 ± 0.1 (3)  |
| Ilk    | 1.0 ± 0.0 (5) | 1.2 ± 0.1 (3) | 1.2 ± 0.1 (3) | 0.9 ± 0.1 (3) | 1.1 ± 0.2 (2) | 0.9 ± 0.0 (3)  | 0.9 ± 0.1 (3)  | 1.0 ± 0.0 (3)  | 1.0 ± 0.0 (3)  |
| Klf10  | 1.0 ± 0.1 (5) | 1.8 ± 0.5 (3) | 2.0 ± 0.6 (3) | 1.5 ± 0.5 (3) | 2.5 ± 0.1 (2) | 2.3 ± 0.1 (3)  | 2.5 ± 0.3 (3)  | 2.4 ± 0.5 (3)  | 2.5 ± 0.1 (3)  |
| Lpin1  | 1.0 ± 0.1 (5) | 1.2 ± 0.1 (3) | 1.4 ± 0.3 (3) | 0.8 ± 0.2 (3) | 1.1 ± 0.1 (2) | 1.0 ± 0.0 (3)  | 1.0 ± 0.0 (3)  | 1.0 ± 0.0 (3)  | 0.9 ± 0.1 (3)  |
| Lpl    | 1.0 ± 0.1 (5) | 2.0 ± 0.7 (3) | 0.7 ± 0.0 (3) | 0.9 ± 0.4 (3) | 1.1 ± 0.1 (2) | 0.8 ± 0.1 (3)  | 0.7 ± 0.1 (3)  | 5.1 ± 2.9 (3)  | 6.7 ± 2.9 (3)  |
| Med1   | 1.0 ± 0.0 (5) | 1.2 ± 0.2 (3) | 1.3 ± 0.0 (3) | 0.7 ± 0.0 (3) | 1.0 ± 0.1 (2) | 0.8 ± 0.0 (3)  | 0.9 ± 0.0 (3)  | 1.1 ± 0.1 (3)  | 1.0 ± 0.1 (3)  |
| Mlycd  | 1.0 ± 0.1 (5) | 1.1 ± 0.2 (3) | 1.4 ± 0.2 (3) | 1.0 ± 0.4 (3) | 1.5 ± 0.0 (2) | 2.1 ± 0.1 (3)  | 2.5 ± 0.1 (3)  | 2.9 ± 0.4 (3)  | 2.5 ± 0.4 (3)  |
| Mmp9   | n/a           | n/a           | n/a           | n/a           | n/a           | n/a            | n/a            | n/a            | n/a            |
| Ncoa3  | 1.0 ± 0.1 (5) | 1.4 ± 0.2 (3) | 1.4 ± 0.0 (3) | 0.8 ± 0.2 (3) | 1.0 ± 0.0 (2) | 0.9 ± 0.1 (3)  | 0.9 ± 0.2 (3)  | 0.8 ± 0.1 (3)  | 0.8 ± 0.1 (3)  |
| Ncoa6  | 1.0 ± 0.0 (5) | 1.4 ± 0.1 (3) | 1.2 ± 0.0 (3) | 1.1 ± 0.4 (3) | 1.2 ± 0.0 (2) | 0.7 ± 0.1 (3)  | 0.8 ± 0.0 (3)  | 0.7 ± 0.1 (3)  | 0.9 ± 0.1 (3)  |
| Nr1h3  | 1.0 ± 0.0 (5) | 1.1 ± 0.2 (3) | 1.5 ± 0.1 (3) | 0.8 ± 0.2 (3) | 1.1 ± 0.0 (2) | 1.6 ± 0.1 (3)  | 1.6 ± 0.1 (3)  | 1.5 ± 0.1 (3)  | 1.3 ± 0.1 (3)  |
| Olr1   | n/a           | n/a           | n/a           | n/a           | n/a           | n/a            | n/a            | n/a            | n/a            |
| Pck1   | 1.0 ± 0.2 (5) | 1.2 ± 0.4 (3) | 1.3 ± 0.1 (3) | 0.5 ± 0.1 (3) | 1.0 ± 0.4 (2) | 1.0 ± 0.2 (3)  | 1.3 ± 0.5 (3)  | 1.1 ± 0.6 (3)  | 1.8 ± 0.9 (3)  |
| Pck2   | 1.0 ± 0.1 (5) | 1.1 ± 0.2 (3) | 1.6 ± 0.3 (3) | 1.1 ± 0.2 (3) | 1.0 ± 0.1 (2) | 1.9 ± 0.4 (3)  | 1.5 ± 0.2 (3)  | 2.2 ± 0.3 (3)  | 2.8 ± 0.3 (3)  |
| Pdpk1  | 1.0 ± 0.1 (5) | 0.9 ± 0.1 (3) | 1.0 ± 0.1 (3) | 0.8 ± 0.1 (3) | 0.9 ± 0.0 (2) | 1.0 ± 0.1 (3)  | 1.0 ± 0.0 (3)  | 1.1 ± 0.1 (3)  | 1.1 ± 0.0 (3)  |

|          |               |               |               |               |               |               |               |               |               |
|----------|---------------|---------------|---------------|---------------|---------------|---------------|---------------|---------------|---------------|
| Pltp     | 1.0 ± 0.1 (5) | 1.2 ± 0.2 (3) | 1.2 ± 0.2 (3) | 0.7 ± 0.1 (3) | 0.9 ± 0.1 (2) | 1.4 ± 0.0 (3) | 1.1 ± 0.1 (3) | 1.0 ± 0.1 (3) | 0.9 ± 0.0 (3) |
| Ppara    | 1.0 ± 0.1 (5) | 1.1 ± 0.1 (3) | 0.8 ± 0.0 (3) | 0.7 ± 0.2 (3) | 0.6 ± 0.0 (2) | 1.0 ± 0.1 (3) | 0.9 ± 0.1 (3) | 0.8 ± 0.1 (3) | 0.9 ± 0.1 (3) |
| Ppard    | 1.0 ± 0.1 (5) | 1.0 ± 0.2 (3) | 1.5 ± 0.1 (3) | 0.6 ± 0.2 (3) | 0.9 ± 0.1 (2) | 1.0 ± 0.1 (3) | 1.2 ± 0.1 (3) | 1.1 ± 0.2 (3) | 0.7 ± 0.1 (3) |
| Pparg    | 1.0 ± 0.1 (5) | 1.6 ± 0.4 (3) | 1.0 ± 0.1 (3) | 1.0 ± 0.2 (3) | 0.9 ± 0.0 (2) | 0.8 ± 0.1 (3) | 1.2 ± 0.2 (3) | 1.7 ± 0.9 (3) | 0.5 ± 0.1 (3) |
| Ppargc1a | 1.0 ± 0.1 (5) | 1.1 ± 0.2 (3) | 0.7 ± 0.3 (3) | 0.5 ± 0.1 (3) | 0.6 ± 0.1 (2) | 0.6 ± 0.0 (3) | 0.7 ± 0.1 (3) | 0.8 ± 0.5 (3) | 0.4 ± 0.0 (3) |
| Ppargc1b | 1.0 ± 0.1 (5) | 1.1 ± 0.1 (3) | 1.3 ± 0.1 (3) | 0.9 ± 0.3 (3) | 0.8 ± 0.2 (2) | 0.7 ± 0.0 (3) | 0.7 ± 0.2 (3) | 1.1 ± 0.1 (3) | 1.1 ± 0.3 (3) |
| Pprc1    | 1.0 ± 0.1 (5) | 1.2 ± 0.4 (3) | 1.2 ± 0.3 (3) | 1.2 ± 0.2 (3) | 1.0 ± 0.2 (2) | 1.2 ± 0.2 (3) | 1.2 ± 0.3 (3) | 1.4 ± 0.2 (3) | 1.5 ± 0.3 (3) |
| Pten     | 1.0 ± 0.0 (5) | 0.8 ± 0.1 (3) | 1.1 ± 0.1 (3) | 0.8 ± 0.0 (3) | 0.9 ± 0.1 (2) | 1.0 ± 0.1 (3) | 0.9 ± 0.0 (3) | 0.9 ± 0.1 (3) | 0.9 ± 0.1 (3) |
| Pyy      | 1.0 ± 0.1 (5) | 1.6 ± 0.4 (3) | 1.3 ± 0.0 (3) | 1.1 ± 0.4 (3) | 1.2 ± 0.0 (2) | 1.6 ± 0.0 (3) | 2.0 ± 0.3 (3) | 2.1 ± 1.0 (3) | 1.8 ± 0.4 (3) |
| Rxra     | 1.0 ± 0.0 (5) | 1.2 ± 0.0 (3) | 1.4 ± 0.0 (3) | 0.7 ± 0.2 (3) | 1.0 ± 0.1 (2) | 1.1 ± 0.1 (3) | 1.1 ± 0.1 (3) | 1.0 ± 0.1 (3) | 1.0 ± 0.1 (3) |
| Rxrb     | 1.0 ± 0.1 (5) | 1.5 ± 0.4 (3) | 1.4 ± 0.1 (3) | 0.9 ± 0.3 (3) | 1.1 ± 0.0 (2) | 0.8 ± 0.0 (3) | 0.9 ± 0.1 (3) | 1.0 ± 0.1 (3) | 0.9 ± 0.1 (3) |
| Rxrg     | 1.0 ± 0.0 (5) | 1.5 ± 0.1 (3) | 1.6 ± 0.1 (3) | 1.1 ± 0.1 (3) | 1.7 ± 0.0 (2) | 1.5 ± 0.1 (3) | 1.6 ± 0.1 (3) | 1.6 ± 0.1 (3) | 1.3 ± 0.1 (3) |
| Scd1     | 1.0 ± 0.1 (5) | 0.8 ± 0.1 (3) | 2.0 ± 0.4 (3) | 1.5 ± 0.2 (3) | 2.7 ± 0.2 (2) | 4.1 ± 0.3 (3) | 4.7 ± 0.1 (3) | 5.6 ± 0.4 (3) | 3.7 ± 0.4 (3) |
| Sirt1    | 1.0 ± 0.1 (5) | 1.0 ± 0.1 (3) | 1.1 ± 0.0 (3) | 0.8 ± 0.1 (3) | 1.0 ± 0.2 (2) | 0.9 ± 0.1 (3) | 0.9 ± 0.1 (3) | 0.9 ± 0.0 (3) | 1.1 ± 0.0 (3) |
| Slc22a5  | 1.0 ± 0.1 (5) | 1.5 ± 0.2 (3) | 2.0 ± 0.3 (3) | 1.4 ± 0.2 (3) | 3.1 ± 0.2 (2) | 2.6 ± 0.5 (3) | 3.0 ± 0.1 (3) | 3.8 ± 0.5 (3) | 4.0 ± 0.4 (3) |
| Slc27a1  | 1.0 ± 0.1 (5) | 1.5 ± 0.1 (3) | 1.6 ± 0.0 (3) | 0.9 ± 0.3 (3) | 1.4 ± 0.0 (2) | 1.1 ± 0.1 (3) | 1.0 ± 0.1 (3) | 1.3 ± 0.2 (3) | 1.3 ± 0.2 (3) |
| Slc27a2  | 1.0 ± 0.1 (5) | 1.3 ± 0.2 (3) | 1.3 ± 0.1 (3) | 1.3 ± 0.1 (3) | 1.8 ± 0.1 (2) | 2.1 ± 0.2 (3) | 2.2 ± 0.1 (3) | 2.3 ± 0.1 (3) | 2.3 ± 0.2 (3) |
| Slc27a4  | 1.0 ± 0.1 (5) | 1.3 ± 0.1 (3) | 1.5 ± 0.1 (3) | 0.8 ± 0.2 (3) | 1.0 ± 0.1 (2) | 1.5 ± 0.1 (3) | 1.0 ± 0.0 (3) | 1.1 ± 0.2 (3) | 0.9 ± 0.0 (3) |
| Slc27a5  | 1.0 ± 0.1 (5) | 1.7 ± 0.4 (3) | 1.2 ± 0.0 (3) | 1.2 ± 0.2 (3) | 1.1 ± 0.0 (2) | 0.9 ± 0.0 (3) | 1.0 ± 0.3 (3) | 0.7 ± 0.0 (3) | 0.7 ± 0.1 (3) |
| Slc27a6  | n/a           |
| Smardc3  | 1.0 ± 0.1 (5) | 1.2 ± 0.1 (3) | 1.4 ± 0.1 (3) | 0.8 ± 0.2 (3) | 0.8 ± 0.1 (2) | 1.0 ± 0.1 (3) | 1.1 ± 0.2 (3) | 1.2 ± 0.5 (3) | 0.6 ± 0.1 (3) |
| Sorbs1   | 1.0 ± 0.1 (5) | 2.0 ± 0.3 (3) | 1.9 ± 0.8 (3) | 1.0 ± 0.5 (3) | 1.3 ± 0.3 (2) | 1.7 ± 0.1 (3) | 1.8 ± 0.4 (3) | 3.5 ± 0.8 (3) | 2.7 ± 0.6 (3) |
| Src      | 1.0 ± 0.1 (5) | 1.5 ± 0.1 (3) | 1.0 ± 0.0 (3) | 0.6 ± 0.1 (3) | 0.9 ± 0.2 (2) | 1.1 ± 0.0 (3) | 1.6 ± 0.3 (3) | 1.5 ± 0.5 (3) | 1.0 ± 0.2 (3) |
| Tgs1     | 1.0 ± 0.0 (5) | 0.8 ± 0.3 (3) | 0.9 ± 0.0 (3) | 0.7 ± 0.2 (3) | 0.9 ± 0.1 (2) | 0.8 ± 0.1 (3) | 1.1 ± 0.2 (3) | 1.1 ± 0.1 (3) | 0.9 ± 0.1 (3) |
| Txnip    | 1.0 ± 0.1 (5) | 1.2 ± 0.1 (3) | 1.3 ± 0.3 (3) | 1.6 ± 0.6 (3) | 3.7 ± 0.0 (2) | 3.8 ± 0.6 (3) | 4.5 ± 0.5 (3) | 3.9 ± 0.9 (3) | 2.7 ± 0.2 (3) |
| Ucp1     | n/a           |
| Actb     | 1.0 ± 0.0 (5) | 1.0 ± 0.2 (3) | 1.1 ± 0.0 (3) | 0.8 ± 0.2 (3) | 0.9 ± 0.1 (2) | 0.9 ± 0.0 (3) | 0.9 ± 0.0 (3) | 0.8 ± 0.0 (3) | 0.8 ± 0.0 (3) |
| B2m      | 1.0 ± 0.0 (5) | 1.3 ± 0.1 (3) | 1.3 ± 0.1 (3) | 0.9 ± 0.0 (3) | 1.2 ± 0.1 (2) | 0.8 ± 0.1 (3) | 0.8 ± 0.0 (3) | 0.7 ± 0.0 (3) | 0.7 ± 0.1 (3) |
| Hprt1    | 1.0 ± 0.0 (5) | 0.9 ± 0.0 (3) | 0.8 ± 0.0 (3) | 1.1 ± 0.2 (3) | 1.0 ± 0.0 (2) | 1.1 ± 0.0 (3) | 1.1 ± 0.1 (3) | 1.1 ± 0.1 (3) | 1.1 ± 0.1 (3) |
| Ldha     | 1.0 ± 0.0 (5) | 0.9 ± 0.2 (3) | 1.0 ± 0.1 (3) | 0.9 ± 0.1 (3) | 1.4 ± 0.0 (2) | 2.2 ± 0.0 (3) | 2.3 ± 0.1 (3) | 2.2 ± 0.2 (3) | 1.8 ± 0.1 (3) |
| Rplp1    | 1.0 ± 0.0 (5) | 1.2 ± 0.2 (3) | 1.1 ± 0.0 (3) | 1.2 ± 0.1 (3) | 1.2 ± 0.1 (2) | 1.1 ± 0.0 (3) | 1.0 ± 0.1 (3) | 1.2 ± 0.1 (3) | 1.1 ± 0.1 (3) |

| RGDC | n/a           |
|------|---------------|---------------|---------------|---------------|---------------|---------------|---------------|---------------|---------------|
| RTC1 | 1.0 ± 0.1 (5) | 1.6 ± 0.3 (3) | 1.3 ± 0.1 (3) | 0.8 ± 0.4 (3) | 1.2 ± 0.0 (2) | 0.9 ± 0.1 (3) | 1.4 ± 0.1 (3) | 1.7 ± 1.1 (3) | 0.6 ± 0.0 (3) |
| RTC2 | 1.0 ± 0.1 (5) | 1.6 ± 0.3 (3) | 1.3 ± 0.1 (3) | 1.1 ± 0.4 (3) | 1.2 ± 0.0 (2) | 1.0 ± 0.1 (3) | 1.4 ± 0.2 (3) | 1.7 ± 1.1 (3) | 0.6 ± 0.0 (3) |
| RTC3 | 1.0 ± 0.1 (5) | 1.5 ± 0.3 (3) | 1.3 ± 0.1 (3) | 1.1 ± 0.4 (3) | 1.2 ± 0.0 (2) | 0.9 ± 0.1 (3) | 1.4 ± 0.2 (3) | 1.6 ± 1.0 (3) | 0.5 ± 0.0 (3) |
| PPC1 | 1.0 ± 0.1 (5) | 1.5 ± 0.3 (3) | 1.3 ± 0.1 (3) | 1.0 ± 0.4 (3) | 1.2 ± 0.0 (2) | 0.9 ± 0.1 (3) | 1.3 ± 0.1 (3) | 1.7 ± 1.1 (3) | 0.5 ± 0.0 (3) |
| PPC2 | 1.0 ± 0.1 (5) | 1.5 ± 0.3 (3) | 1.3 ± 0.1 (3) | 1.1 ± 0.4 (3) | 1.2 ± 0.0 (2) | 0.9 ± 0.1 (3) | 1.4 ± 0.1 (3) | 1.7 ± 1.1 (3) | 0.5 ± 0.0 (3) |
| PPC3 | 1.0 ± 0.1 (5) | 1.5 ± 0.3 (3) | 1.3 ± 0.1 (3) | 1.0 ± 0.3 (3) | 1.1 ± 0.0 (2) | 1.0 ± 0.1 (3) | 1.4 ± 0.1 (3) | 1.7 ± 1.1 (3) | 0.5 ± 0.0 (3) |

Data represent fold induction versus control (mean ± standard error (n)).

Genes labelled “n/a” were not sufficiently expressed ( $C_T \geq 36$ ) to analyze.

GD=gestation day; PPAR=peroxisome proliferator activated receptor; HFPO-DA=hexafluoropropylene oxide-dimer acid

**Table S7. Maternal, perinatal, and pubertal endpoints from pilot postnatal study (GD14-18 oral maternal HFPO-DA dosing).**

|                                    | Litter means    |                 | Individual means |                         |
|------------------------------------|-----------------|-----------------|------------------|-------------------------|
|                                    | 0 mg/kg/d       | 125 mg/kg/d     | 0 mg/kg/d        | 125 mg/kg/d             |
| Dam BW GD14 (g)                    | 333.1 ± 6.2 (2) | 325.5 ± 5.2 (3) | -                | -                       |
| Dam BW GD18 (g)                    | 366.0 ± 5.5 (2) | 354.9 ± 9.0 (3) | -                | -                       |
| Dam BW gain (g)                    | 32.9 ± 0.7 (2)  | 29.4 ± 6.0 (3)  | -                | -                       |
| No. implants                       | 13.0 ± 2.0 (2)  | 13.0 ± 1.0 (3)  | -                | -                       |
| No. pups on PND2                   | 12.5 ± 1.5 (2)  | 12.7 ± 0.7 (3)  | -                | -                       |
| Post-implantation loss (%) on PND2 | 3.4 ± 3.4 (2)   | 2.2 ± 2.2 (3)   | -                | -                       |
| Female pup BW on PND2 (g)          | 7.9 ± 1.0 (2)   | 7.5 ± 0.1 (3)   | 8.2 ± 0.3 (11)   | <b>7.5 ± 0.1 (19)</b>   |
| Female AGD on PND2 (mm)            | 1.7 ± 0.1 (2)   | 1.5 ± 0.1 (3)   | 1.7 ± 0.1 (11)   | 1.5 ± 0.0 (19)          |
| Male pup BW on PND2 (g)            | 8.1 ± 1.2 (2)   | 7.8 ± 0.1 (3)   | 7.6 ± 0.3 (14)   | 7.8 ± 0.1 (19)          |
| Male AGD on PND2 (mm)              | 3.7 ± 0.2 (2)   | 3.7 ± 0.1 (3)   | 3.6 ± 0.1 (14)   | 3.7 ± 0.1 (19)          |
| Female pup BW on PND13 (g)         | 28.1 ± 2.3 (2)  | 28.7 ± 0.1 (3)  | 28.7 ± 0.8 (11)  | 28.7 ± 0.3 (19)         |
| Female NR on PND13 (#)             | 12.0 ± 0.0 (2)  | 12.0 ± 0.0 (3)  | 12.0 ± 0.0 (11)  | 12.0 ± 0.0 (19)         |
| Male pup BW on PND13 (g)           | 28.5 ± 2.8 (2)  | 29.5 ± 0.5 (3)  | 27.3 ± 0.8 (14)  | 29.3 ± 0.3 (19)         |
| Male NR on PND2 (#)                | 0.0 ± 0.0 (2)   | 0.1 ± 0.1 (3)   | 0.0 ± 0.0 (14)   | 0.1 ± 0.1 (19)          |
| Female BW on PND27 (g)             | 82.4 ± 9.1 (2)  | 78.2 ± 3.5 (3)  | 84.9 ± 3.0 (11)  | <b>79.1 ± 1.4 (19)</b>  |
| Male BW on PND27 (g)               | 84.5 ± 9.3 (2)  | 83.3 ± 4.7 (3)  | 80.5 ± 2.5 (14)  | 81.1 ± 1.6 (19)         |
| Female BW at VO (g)                | 131.3 ± 3.7 (2) | 124.3 ± 4.2 (3) | 132.3 ± 3.6 (11) | <b>123.4 ± 2.3 (19)</b> |
| Male BW at PPS (g)                 | 215.5 ± 6.5 (2) | 214.6 ± 8.0 (3) | 212.8 ± 2.8 (14) | 211.4 ± 3.7 (19)        |

Data represent mean ± standard error (n). Values significantly different (p<0.05) from control, based on ANOVA, identified in bold text and shaded cells.

BW: body weight; GD: gestation day; PND: postnatal day; AGD: ano-genital distance; NR: nipple retention; VO: vaginal opening; PPS: preputial separation; HFPO-DA: hexafluoropropylene oxide-dimer acid

**Table S8. Adult male necropsy endpoints from pilot postnatal study (GD14-18 oral maternal HFPO-DA dosing).**

|                                           | Litter means     |                         | Individual means   |                           |
|-------------------------------------------|------------------|-------------------------|--------------------|---------------------------|
|                                           | 0 mg/kg/d        | 125 mg/kg/d             | 0 mg/kg/d          | 125 mg/kg/d               |
| Body weight (g)                           | 686.6 ± 39.1 (2) | 682.6 ± 13.4 (3)        | 703.3 ± 17.9 (14)  | 676.5 ± 10.6 (19)         |
| Glans penis (mg)                          | 139.8 ± 1.1 (2)  | 135.0 ± 1.5 (3)         | 139.4 ± 2.6 (13)   | 134.5 ± 3.0 (19)          |
| Ventral prostate (mg)                     | 725.5 ± 31.7 (2) | 678.7 ± 30.1 (3)        | 711.9 ± 41.4 (14)  | 682.1 ± 32.7 (19)         |
| Paired seminal vesicles (g)               | 1.8 ± 0.0 (2)    | 1.8 ± 0.1 (3)           | 1.8 ± 0.1 (14)     | 1.8 ± 0.1 (19)            |
| Paired testes (g)                         | 4.1 ± 0.1 (2)    | 3.8 ± 0.1 (3)           | 4.2 ± 0.1 (14)     | <b>3.8 ± 0.1 (19)</b>     |
| Paired epididymides (mg)                  | 1417.8 ± 8.8 (2) | 1323.7 ± 24.3 (3)       | 1421.6 ± 15.6 (14) | <b>1331.2 ± 21.2 (19)</b> |
| Right testis (g)                          | 2.1 ± 0.1 (2)    | 1.9 ± 0.0 (3)           | 2.1 ± 0.0 (14)     | <b>1.9 ± 0.0 (19)</b>     |
| Right cauda (mg)                          | 327.8 ± 7.7 (2)  | 309.0 ± 6.0 (3)         | 324.5 ± 4.5 (14)   | 310.5 ± 6.2 (19)          |
| Right corpus/caput (mg)                   | 387.7 ± 14.3 (2) | 350.5 ± 5.9 (3)         | 393.8 ± 5.5 (14)   | <b>352.6 ± 7.1 (19)</b>   |
| Right epididymis (mg)                     | 715.5 ± 6.6 (2)  | <b>659.5 ± 11.8 (3)</b> | 718.3 ± 7.1 (14)   | <b>663.1 ± 11.2 (19)</b>  |
| Left testis (g)                           | 2.1 ± 0.0 (2)    | 1.9 ± 0.0 (3)           | 2.1 ± 0.0 (14)     | <b>1.9 ± 0.0 (19)</b>     |
| Left epididymis (mg)                      | 702.4 ± 2.2 (2)  | 664.2 ± 12.5 (3)        | 703.3 ± 10.0 (14)  | <b>668.1 ± 10.4 (19)</b>  |
| LABC (g)                                  | 1.5 ± 0.0 (2)    | 1.5 ± 0.1 (3)           | 1.5 ± 0.0 (14)     | 1.6 ± 0.0 (19)            |
| Paired Cowper's glands (mg)               | 153.7 ± 4.6 (2)  | 165.6 ± 9.7 (3)         | 151.8 ± 5.9 (14)   | 163.4 ± 5.2 (19)          |
| Visceral adipose tissue (g)               | 26.2 ± 3.0 (2)   | 26.8 ± 2.4 (3)          | 27.5 ± 1.6 (14)    | 25.8 ± 1.5 (19)           |
| Epididymal adipose tissue (g)             | 9.1 ± 1.3 (2)    | 8.2 ± 1.0 (3)           | 9.6 ± 0.7 (14)     | <b>7.8 ± 0.5 (19)</b>     |
| Paired kidneys (g)                        | 3.6 ± 0.1 (2)    | 3.4 ± 0.0 (3)           | 3.6 ± 0.1 (14)     | 3.4 ± 0.1 (18)            |
| Liver (g)                                 | 20.9 ± 1.3 (2)   | 20.2 ± 0.4 (3)          | 21.4 ± 0.7 (14)    | 20.1 ± 0.4 (19)           |
| Corpus/caput sperm (10 <sup>6</sup> )     | 75.8 ± 0.6 (2)   | 72.0 ± 2.8 (3)          | 75.9 ± 2.0 (10)    | 72.6 ± 2.3 (15)           |
| Cauda sperm (10 <sup>6</sup> )            | 168.9 ± 6.9 (2)  | 160.0 ± 3.4 (3)         | 167.5 ± 5.6 (10)   | 159.7 ± 4.7 (15)          |
| Total epididymal sperm (10 <sup>6</sup> ) | 195.8 ± 5.1 (2)  | 185.6 ± 2.0 (3)         | 194.8 ± 5.3 (10)   | 185.8 ± 4.7 (15)          |

Data represent mean ± standard error (n). Values significantly different (p<0.05) from control, based on ANOVA, identified in bold text and shaded cells.

GD: gestation day; LABC: levator ani-bulbocavernosus; HFPO-DA: hexafluoropropylene oxide-dimer acid



**Table S9. Adult female necropsy endpoints from pilot postnatal study (GD14-18 oral maternal HFPO-DA dosing).**

|                             | Litter means     |                  | Individual means  |                        |
|-----------------------------|------------------|------------------|-------------------|------------------------|
|                             | 0 mg/kg/d        | 125 mg/kg/d      | 0 mg/kg/d         | 125 mg/kg/d            |
| Body weight (g)             | 378.1 ± 16.9 (2) | 374.0 ± 25.0 (3) | 373.5 ± 8.3 (11)  | 370.3 ± 12.3 (19)      |
| AGD (mm)                    | 18.9 ± 0.6 (2)   | 16.8 ± 0.5 (3)   | 19.1 ± 0.4 (11)   | <b>16.7 ± 0.7 (19)</b> |
| Uterus (mg)                 | 630.7 ± 52.5 (2) | 635.4 ± 74.3 (3) | 645.0 ± 55.8 (11) | 635.6 ± 48.9 (19)      |
| Paired ovaries (mg)         | 135.5 ± 3.4 (2)  | 122.5 ± 8.6 (3)  | 134.6 ± 4.6 (11)  | 123.2 ± 3.6 (19)       |
| Liver (g)                   | 12.7 ± 0.7 (2)   | 11.4 ± 0.5 (3)   | 12.5 ± 0.4 (11)   | <b>11.3 ± 0.3 (19)</b> |
| Paired kidneys (g)          | 2.2 ± 0.1 (2)    | 2.1 ± 0.1 (3)    | 2.3 ± 0.1 (11)    | 2.1 ± 0.1 (19)         |
| Visceral adipose tissue (g) | 23.9 ± 3.2 (2)   | 25.1 ± 4.6 (3)   | 23.0 ± 1.7 (11)   | 25.2 ± 2.4 (19)        |

Data represent mean ± standard error (n). Values significantly different (p<0.05) from control, based on ANOVA, identified in bold text and shaded cells.

GD: gestation day; AGD: ano-genital distance; HFPO-DA: hexafluoropropylene oxide-dimer acid

**Table S10. Maternal serum and fetal/neonatal plasma HFPO-DA concentrations.**

|                                            | HFPO-DA dose (mg/kg/d)   |                        |                        |                      |                       |                       |                        |                        |                         |
|--------------------------------------------|--------------------------|------------------------|------------------------|----------------------|-----------------------|-----------------------|------------------------|------------------------|-------------------------|
|                                            | 0                        | 1                      | 3                      | 10                   | 30                    | 62.5                  | 125                    | 250                    | 500                     |
| Pregnant dam serum<br>( $\mu\text{g/mL}$ ) | $0.027 \pm 0.008$<br>(9) | $0.68 \pm 0.08$<br>(6) | $1.2 \pm 0.3$<br>(6)   | $4.6 \pm 1.1$<br>(6) | $13.9 \pm 3.1$<br>(6) | $30.7 \pm 2.9$<br>(3) | $46.0 \pm 10.3$<br>(3) | $81.8 \pm 21.6$<br>(3) | $100.7 \pm 26.4$<br>(3) |
| Fetal plasma<br>( $\mu\text{g/mL}$ )       | $0.018 \pm 0.010$<br>(3) | $0.13 \pm 0.06$<br>(3) | $0.49 \pm 0.04$<br>(3) | $1.9 \pm 0.2$<br>(3) | $3.5 \pm 0.4$<br>(3)  | n/a                   | n/a                    | n/a                    | n/a                     |

Data represent mean  $\pm$  standard error (n)

n/a indicates no sample collected at that dose

HFPO-DA=hexafluoropropylene oxide-dimer acid
